# Supplementary material for: Temporal Changes in Randomness of Bird Communities across Central Europe
Source: PLoS One. 2014 Nov 11;9(11):e112347. doi: 10.1371/journal.pone.0112347 (PMC4227846; doi:10.1371/journal.pone.0112347)
Supplement: Appendix S4 — Relevant data as used for nls() modelling. (XLSX) [file pone.0112347.s005.xlsx]

## Sheet: explo.bird.dissim3
Appendix S4. Relevant data as used for nls() modelling									(original file name: explo.bird.dissim3.txt)
Renner, Gossner, Kahl, Kalko, Weisser, et al.
	Plot		Jaccard Dissimilarity (1-D')	for	birds	per	year
Exploratory	Plot1	Plot2	2008	2009	2010	2011	2012	all 5 years merged	distance between plots in meters
ALB	1	2	0.364	0.2	0.312	0.429	0.571	0.3752	10979.6
ALB	1	3	0.5	0.545	0.286	0.437	0.733	0.5002	7484.24
ALB	1	4	0.75	0.778	0.692	0.765	0.75	0.747	11002
ALB	1	5	0.667	0.615	0.412	0.682	0.75	0.6252	8804.92
ALB	1	6	0.667	0.615	0.5	0.6	0.571	0.5906	12466.6
ALB	1	7	0.667	0.667	0.529	0.619	0.7	0.6364	10583.9
ALB	1	8	0.615	0.538	0.353	0.625	0.786	0.5834	11195.9
ALB	1	9	0.636	0.583	0.526	0.526	0.864	0.627	13489.3
ALB	1	10	0.364	0.273	0.471	0.5	0.533	0.4282	11969.5
ALB	1	11	0.455	0.364	0.312	0.267	0.615	0.4026	1852.81
ALB	1	12	0.125	0.2	0.389	0.471	0.571	0.3512	13551.1
ALB	1	13	0.4	0.5	0.389	0.429	0.625	0.4686	12009.9
ALB	1	14	0.222	0.111	0.333	0.467	0.667	0.36	11402.9
ALB	1	15	0.769	0.643	0.5	0.812	0.714	0.6876	11205.2
ALB	1	16	0.636	0.9	0.5	0.786	0.765	0.7174	13079.5
ALB	1	17	0.7	0.727	0.5	0.533	0.933	0.6786	11318.5
ALB	1	18	0.636	0.714	0.312	0.474	0.75	0.5772	14612.7
ALB	1	19	0.667	0.643	0.65	0.667	0.75	0.6754	1848.24
ALB	1	20	0.692	0.692	0.333	0.619	0.667	0.6006	12062.1
ALB	1	21	0.667	0.643	0.556	0.579	0.842	0.6574	1202.93
ALB	1	22	0.667	0.643	0.45	0.667	0.733	0.632	13783.2
ALB	1	23	0.692	0.692	0.632	0.81	0.769	0.719	15310
ALB	1	24	0.692	0.727	0.706	0.706	0.889	0.744	2930.35
ALB	1	25	0.727	1	0.625	0.812	0.933	0.8194	6404.48
ALB	1	26	0.667	0.769	0.5	0.833	0.824	0.7186	10215.8
ALB	1	27	0.6	0.917	0.5	0.722	0.769	0.7016	13496.6
ALB	1	28	0.545	0.538	0.333	0.471	0.692	0.5158	2690.96
ALB	1	29	0.462	0.364	0.294	0.5	0.643	0.4526	10626.4
ALB	1	30	0.727	0.818	0.375	0.6	0.733	0.6506	12029.3
ALB	1	31	0.364	0.364	0.4	0.471	0.647	0.4492	12212.3
ALB	1	32	0.667	0.5	0.471	0.286	0.687	0.5222	7875.9
ALB	1	33	0.538	0.5	0.375	0.467	0.417	0.4594	15058.6
ALB	1	34	0.455	0.545	0.333	0.467	0.5	0.46	15368.9
ALB	1	35	0.818	0.727	0.625	0.579	0.824	0.7146	6974.53
ALB	1	36	0.727	0.667	0.471	0.625	0.812	0.6604	13632.2
ALB	1	37	0.714	0.727	0.556	0.684	0.75	0.6862	12308.7
ALB	1	38	0.692	0.9	0.643	0.714	0.714	0.7326	13390.7
ALB	1	39	0.636	0.727	0.529	0.643	0.687	0.6444	13500.3
ALB	1	40	0.6	0.615	0.6	0.812	0.769	0.6792	2639.58
ALB	1	41	0.692	0.538	0.437	0.667	0.706	0.608	13652.6
ALB	1	42	0.692	0.615	0.467	0.667	0.857	0.6596	12638.9
ALB	1	43	0.714	0.643	0.471	0.706	0.944	0.6956	11476
ALB	1	44	0.75	0.692	0.579	0.737	0.944	0.7404	13165.6
ALB	1	45	0.714	0.818	0.462	0.812	0.769	0.715	15812.7
ALB	1	46	0.538	0.6	0.437	0.687	0.769	0.6062	10374.8
ALB	1	47	0.5	0.533	0.437	0.4	0.571	0.4882	8725.46
ALB	1	48	0.643	0.714	0.353	0.632	0.722	0.6128	14287.5
ALB	1	49	0.6	0.643	0.529	0.632	0.588	0.5984	11113.7
ALB	1	50	0.733	0.417	0.389	0.368	0.842	0.5498	11240.9
ALB	2	3	0.308	0.545	0.437	0.467	0.417	0.4348	3601.69
ALB	2	4	0.727	0.778	0.714	0.733	0.75	0.7404	8177.64
ALB	2	5	0.462	0.5	0.444	0.5	0.75	0.5312	6429.66
ALB	2	6	0.4	0.615	0.611	0.471	0.333	0.486	7170.78
ALB	2	7	0.333	0.545	0.556	0.579	0.7	0.5426	6913.09
ALB	2	8	0.429	0.417	0.389	0.462	0.692	0.4778	2309.57
ALB	2	9	0.273	0.455	0.55	0.471	0.611	0.472	4870.16
ALB	2	10	0.429	0.273	0.5	0.545	0.429	0.4352	3098.55
ALB	2	11	0.25	0.364	0.25	0.5	0.364	0.3456	12630.1
ALB	2	12	0.273	0.2	0.333	0.5	0.462	0.3536	7506.54
ALB	2	13	0.333	0.364	0.333	0.462	0.429	0.3842	3499.55
ALB	2	14	0.333	0.111	0.267	0.385	0.333	0.2858	1127.9
ALB	2	15	0.667	0.643	0.353	0.786	0.714	0.6326	4212.22
ALB	2	16	0.538	0.9	0.526	0.846	0.6	0.682	6937.46
ALB	2	17	0.583	0.727	0.533	0.571	0.933	0.6694	8239.03
ALB	2	18	0.538	0.714	0.25	0.5	0.667	0.5338	8874.35
ALB	2	19	0.462	0.538	0.667	0.632	0.667	0.5932	11969.8
ALB	2	20	0.385	0.583	0.267	0.5	0.571	0.4612	2662.42
ALB	2	21	0.333	0.538	0.5	0.611	0.706	0.5376	11823.9
ALB	2	22	0.333	0.538	0.476	0.714	0.643	0.5408	7498.84
ALB	2	23	0.385	0.583	0.65	0.722	0.667	0.6014	10133.5
ALB	2	24	0.6	0.6	0.562	0.75	0.75	0.6524	11779.5
ALB	2	25	0.615	0.909	0.562	0.867	0.857	0.762	11839.9
ALB	2	26	0.333	0.667	0.529	0.812	0.75	0.6182	7655.06
ALB	2	27	0.615	0.818	0.437	0.765	0.857	0.6984	9376.47
ALB	2	28	0.462	0.538	0.375	0.588	0.583	0.5092	12958.8
ALB	2	29	0.4	0.364	0.333	0.533	0.417	0.4094	559.017
ALB	2	30	0.5	0.818	0.579	0.643	0.733	0.6546	1682.38
ALB	2	31	0.308	0.364	0.529	0.588	0.357	0.4292	7010.71
ALB	2	32	0.462	0.5	0.5	0.429	0.385	0.4552	3570.45
ALB	2	33	0.467	0.5	0.412	0.5	0.273	0.4304	10371.8
ALB	2	34	0.5	0.545	0.375	0.5	0.385	0.461	10768.8
ALB	2	35	0.692	0.6	0.562	0.611	0.824	0.6578	8696.63
ALB	2	36	0.615	0.545	0.412	0.75	0.643	0.593	9510.01
ALB	2	37	0.429	0.727	0.5	0.647	0.529	0.5664	6635.1
ALB	2	38	0.5	0.778	0.667	0.667	0.714	0.6652	6969.83
ALB	2	39	0.417	0.727	0.471	0.692	0.5	0.5614	8534.49
ALB	2	40	0.615	0.5	0.625	0.786	0.857	0.6766	13301.7
ALB	2	41	0.5	0.538	0.556	0.429	0.533	0.5112	4270.61
ALB	2	42	0.385	0.615	0.667	0.625	0.857	0.6298	7710.32
ALB	2	43	0.533	0.643	0.5	0.667	0.812	0.631	1992.03
ALB	2	44	0.417	0.583	0.526	0.842	0.812	0.636	9528.91
ALB	2	45	0.533	0.818	0.6	0.786	0.667	0.6808	11143.4
ALB	2	46	0.467	0.6	0.471	0.733	0.667	0.5876	909.065
ALB	2	47	0.417	0.429	0.471	0.308	0.333	0.3916	5842.25
ALB	2	48	0.467	0.714	0.389	0.4	0.647	0.5234	9034.41
ALB	2	49	0.5	0.643	0.556	0.588	0.737	0.6048	11764.6
ALB	2	50	0.722	0.273	0.333	0.474	0.706	0.5016	7310.16
ALB	3	4	0.833	0.714	0.75	0.706	0.727	0.746	8330.43
ALB	3	5	0.462	0.545	0.437	0.571	0.538	0.5106	4450
ALB	3	6	0.4	0.545	0.533	0.389	0.273	0.428	6989.28
ALB	3	7	0.462	0.444	0.562	0.421	0.611	0.5	7201.18
ALB	3	8	0.308	0.455	0.375	0.467	0.545	0.43	3850.21
ALB	3	9	0.417	0.5	0.556	0.389	0.5	0.4724	6502.01
ALB	3	10	0.429	0.455	0.5	0.538	0.5	0.4844	4736.29
ALB	3	11	0.5	0.545	0.333	0.412	0.455	0.449	9211.53
ALB	3	12	0.417	0.545	0.412	0.412	0.538	0.4648	9068.3
ALB	3	13	0.462	0.667	0.312	0.357	0.5	0.4596	4892.54
ALB	3	14	0.462	0.5	0.357	0.286	0.538	0.4286	4290.33
ALB	3	15	0.667	0.583	0.529	0.75	0.786	0.663	4543.27
ALB	3	16	0.417	0.714	0.529	0.8	0.571	0.6062	7206.18
ALB	3	17	0.692	0.5	0.643	0.467	0.846	0.6296	8520.15
ALB	3	18	0.417	0.545	0.437	0.5	0.643	0.5084	10439.5
ALB	3	19	0.462	0.455	0.529	0.55	0.538	0.5068	8652.31
ALB	3	20	0.5	0.5	0.467	0.571	0.538	0.5152	5425.32
ALB	3	21	0.462	0.583	0.667	0.6	0.6	0.5824	8415.25
ALB	3	22	0.462	0.455	0.474	0.6	0.615	0.5212	7920.46
ALB	3	23	0.5	0.636	0.667	0.7	0.636	0.6278	10234.3
ALB	3	24	0.5	0.5	0.75	0.647	0.733	0.626	8676.46
ALB	3	25	0.615	1	0.667	0.75	0.846	0.7756	8570.3
ALB	3	26	0.333	0.6	0.533	0.706	0.812	0.5968	6140.37
ALB	3	27	0.615	0.778	0.533	0.667	0.846	0.6878	8894.05
ALB	3	28	0.462	0.455	0.357	0.412	0.667	0.4706	9660.25
ALB	3	29	0.286	0.4	0.412	0.214	0.364	0.3352	3181.27
ALB	3	30	0.5	0.429	0.5	0.625	0.5	0.5108	4548.43
ALB	3	31	0.308	0.545	0.429	0.412	0.533	0.4454	8091.36
ALB	3	32	0.333	0.545	0.4	0.437	0.571	0.4572	822.253
ALB	3	33	0.467	0.545	0.4	0.4	0.5	0.4624	10258.9
ALB	3	34	0.5	0.727	0.467	0.5	0.462	0.5312	10649.1
ALB	3	35	0.786	0.667	0.667	0.667	0.812	0.7198	5767.12
ALB	3	36	0.615	0.444	0.5	0.562	0.714	0.567	10433.4
ALB	3	37	0.429	0.5	0.5	0.556	0.588	0.5146	6582.1
ALB	3	38	0.5	0.875	0.692	0.643	0.786	0.6992	7406.57
ALB	3	39	0.538	0.667	0.562	0.667	0.571	0.601	9718.09
ALB	3	40	0.615	0.4	0.643	0.667	0.75	0.615	9722.86
ALB	3	41	0.385	0.455	0.357	0.529	0.6	0.4652	6421.89
ALB	3	42	0.385	0.4	0.5	0.529	0.75	0.5128	7411.99
ALB	3	43	0.429	0.583	0.5	0.722	0.714	0.5896	4053.69
ALB	3	44	0.538	0.5	0.684	0.684	0.8	0.6412	10246
ALB	3	45	0.308	0.625	0.5	0.667	0.75	0.57	11085.6
ALB	3	46	0.357	0.286	0.357	0.533	0.636	0.4338	2904.51
ALB	3	47	0.417	0.571	0.562	0.333	0.538	0.4842	3902.86
ALB	3	48	0.357	0.545	0.267	0.5	0.533	0.4404	9070.62
ALB	3	49	0.364	0.455	0.357	0.579	0.789	0.5088	9668.47
ALB	3	50	0.647	0.455	0.5	0.476	0.6	0.5356	7816.86
ALB	4	5	0.667	0.778	0.714	0.556	0.75	0.693	12780.3
ALB	4	6	0.769	0.778	0.636	0.611	0.636	0.686	14903.2
ALB	4	7	0.667	0.714	0.769	0.556	0.687	0.6786	1264.6
ALB	4	8	0.833	0.8	0.733	0.643	0.5	0.7018	10351.6
ALB	4	9	0.625	0.75	0.812	0.611	0.75	0.7096	13047.3
ALB	4	10	0.833	0.8	0.786	0.75	0.692	0.7722	11237.9
ALB	4	11	0.7	0.778	0.8	0.789	0.7	0.7534	11684.1
ALB	4	12	0.778	0.778	0.75	0.722	0.636	0.7328	3330.98
ALB	4	13	0.8	0.778	0.75	0.643	0.692	0.7326	11612.9
ALB	4	14	0.8	0.75	0.667	0.667	0.846	0.746	7364.23
ALB	4	15	0.667	0.909	0.714	0.4	0.7	0.678	12021.4
ALB	4	16	0.778	0.667	0.714	0.833	0.545	0.7074	14868.6
ALB	4	17	0.5	0.6	0.5	0.417	0.9	0.5834	323.514
ALB	4	18	0.778	0.9	0.714	0.632	0.846	0.774	3878.46
ALB	4	19	0.667	0.8	0.8	0.437	0.636	0.668	10665.4
ALB	4	20	0.7	0.889	0.667	0.471	0.75	0.6954	6352.23
ALB	4	21	0.667	0.8	0.692	0.5	0.692	0.6702	11040.5
ALB	4	22	0.667	0.8	0.778	0.786	0.727	0.7516	15502.6
ALB	4	23	0.7	0.889	0.867	0.625	0.429	0.702	18067.5
ALB	4	24	0.7	0.833	0.7	0.417	0.846	0.6992	9621.38
ALB	4	25	0.75	1	0.556	0.545	0.9	0.7502	15580.8
ALB	4	26	0.667	0.714	0.75	0.364	0.75	0.649	14459.2
ALB	4	27	0.571	0.8	0.636	0.333	0.625	0.593	16996.2
ALB	4	28	0.8	0.8	0.667	0.562	0.8	0.7258	11285.4
ALB	4	29	0.857	0.778	0.75	0.6	0.833	0.7636	8454.41
ALB	4	30	0.571	1	0.692	0.5	0.6	0.6726	9821.07
ALB	4	31	0.833	0.9	0.75	0.722	0.714	0.7838	2185.65
ALB	4	32	0.8	0.778	0.867	0.687	0.769	0.7802	9089.32
ALB	4	33	0.846	0.778	0.692	0.75	0.6	0.7332	18212.3
ALB	4	34	0.818	1	0.769	0.667	0.769	0.8046	18611.9
ALB	4	35	0.714	0.833	0.7	0.588	0.846	0.7362	13630.8
ALB	4	36	0.75	0.714	0.786	0.417	0.833	0.7	2630.41
ALB	4	37	0.727	0.833	0.692	0.533	0.75	0.707	14412.7
ALB	4	38	0.7	1	0.75	0.5	0.7	0.73	14964.6
ALB	4	39	0.625	0.6	0.667	0.769	0.545	0.6412	2679.3
ALB	4	40	0.75	0.778	0.667	0.4	0.625	0.644	13593.7
ALB	4	41	0.818	0.8	0.667	0.6	0.692	0.7154	12415.1
ALB	4	42	0.7	0.778	0.6	0.5	0.778	0.6712	15397.3
ALB	4	43	0.833	0.8	0.692	0.643	0.833	0.7602	10133.2
ALB	4	44	0.778	0.75	0.714	0.5	0.833	0.715	2192.73
ALB	4	45	0.833	0.5	0.429	0.545	0.778	0.617	19021.5
ALB	4	46	0.846	0.6	0.769	0.615	0.625	0.691	8598.75
ALB	4	47	0.778	0.846	0.769	0.765	0.636	0.7588	12230.1
ALB	4	48	0.846	0.9	0.733	0.647	0.714	0.768	16921.1
ALB	4	49	0.75	0.8	0.769	0.562	0.812	0.7386	17895.1
ALB	4	50	0.75	0.8	0.75	0.667	0.786	0.7506	1053.71
ALB	5	6	0.308	0.2	0.437	0.263	0.571	0.3558	3665.76
ALB	5	7	0.2	0.222	0.375	0.3	0.556	0.3306	11645.5
ALB	5	8	0.462	0.538	0.187	0.412	0.692	0.4582	4761.7
ALB	5	9	0.3	0.111	0.389	0.35	0.611	0.3522	5590.44
ALB	5	10	0.571	0.417	0.5	0.789	0.706	0.5966	4917.37
ALB	5	11	0.417	0.615	0.444	0.652	0.8	0.5856	10647.3
ALB	5	12	0.583	0.615	0.421	0.524	0.667	0.562	13318.5
ALB	5	13	0.615	0.5	0.333	0.65	0.533	0.5262	4680.53
ALB	5	14	0.615	0.583	0.556	0.526	0.75	0.606	7513.77
ALB	5	15	0.5	0.417	0.526	0.588	0.714	0.549	3406.95
ALB	5	16	0.455	0.778	0.25	0.778	0.5	0.5522	4333.79
ALB	5	17	0.333	0.444	0.533	0.5	0.667	0.4954	12969.5
ALB	5	18	0.3	0.364	0.353	0.381	0.667	0.413	14708.3
ALB	5	19	0	0.1	0.526	0.35	0.571	0.3094	10500.4
ALB	5	20	0.273	0.3	0.375	0.3	0.462	0.342	8989.88
ALB	5	21	0.2	0.273	0.5	0.316	0.533	0.3644	9985.56
ALB	5	22	0.2	0.273	0.222	0.684	0.538	0.3834	5011.57
ALB	5	23	0.273	0.3	0.412	0.571	0.545	0.4202	6601.11
ALB	5	24	0.538	0.444	0.647	0.5	0.667	0.5592	11056.4
ALB	5	25	0.4	0.8	0.562	0.667	0.667	0.6192	6274.75
ALB	5	26	0.364	0.4	0.437	0.471	0.667	0.4678	1755.14
ALB	5	27	0.4	0.556	0.333	0.526	0.667	0.4964	4915.47
ALB	5	28	0.5	0.417	0.375	0.45	0.692	0.4868	11455.3
ALB	5	29	0.429	0.5	0.421	0.55	0.643	0.5086	5871.87
ALB	5	30	0.4	0.7	0.312	0.556	0.643	0.5222	6120.89
ALB	5	31	0.667	0.5	0.611	0.652	0.789	0.6438	12447.4
ALB	5	32	0.364	0.364	0.5	0.619	0.765	0.5224	3715.62
ALB	5	33	0.6	0.364	0.579	0.667	0.733	0.5886	6441.57
ALB	5	34	0.643	0.857	0.556	0.667	0.6	0.6646	6793.95
ALB	5	35	0.5	0.444	0.562	0.4	0.667	0.5146	2900.07
ALB	5	36	0.4	0.222	0.5	0.579	0.643	0.4688	14843.4
ALB	5	37	0.333	0.444	0.412	0.421	0.611	0.4442	3556.88
ALB	5	38	0.273	0.778	0.571	0.647	0.615	0.5768	4666.22
ALB	5	39	0.3	0.6	0.267	0.667	0.687	0.5042	14075.8
ALB	5	40	0.545	0.2	0.429	0.588	0.545	0.4614	10119
ALB	5	41	0.417	0.417	0.143	0.294	0.533	0.3608	6188.37
ALB	5	42	0.1	0.364	0.4	0.389	0.769	0.4044	3843.03
ALB	5	43	0.333	0.417	0.2	0.5	0.733	0.4366	5249.7
ALB	5	44	0.3	0.3	0.526	0.55	0.733	0.4818	14678.5
ALB	5	45	0.333	0.556	0.5	0.667	0.769	0.565	7245.72
ALB	5	46	0.5	0.444	0.375	0.556	0.769	0.5288	5528.05
ALB	5	47	0.455	0.429	0.471	0.474	0.667	0.4992	598.273
ALB	5	48	0.5	0.364	0.389	0.368	0.562	0.4366	5522.32
ALB	5	49	0.4	0.273	0.556	0.368	0.588	0.437	5390.23
ALB	5	50	0.5	0.273	0.421	0.364	0.625	0.4366	12251.3
ALB	6	7	0.308	0.4	0.562	0.167	0.556	0.3986	13671.2
ALB	6	8	0.4	0.538	0.556	0.471	0.455	0.484	4876.47
ALB	6	9	0.385	0.3	0.632	0.222	0.611	0.43	3567.24
ALB	6	10	0.5	0.417	0.588	0.625	0.308	0.4876	4308
ALB	6	11	0.357	0.5	0.611	0.571	0.364	0.4806	14311.3
ALB	6	12	0.6	0.5	0.579	0.333	0.462	0.4948	14669.7
ALB	6	13	0.533	0.615	0.412	0.471	0.429	0.492	3885.57
ALB	6	14	0.625	0.583	0.562	0.312	0.462	0.5088	8272.46
ALB	6	15	0.533	0.538	0.611	0.647	0.714	0.6086	2964.05
ALB	6	16	0.385	0.778	0.437	0.765	0.5	0.573	884.59
ALB	6	17	0.538	0.444	0.643	0.375	0.769	0.5538	15031.3
ALB	6	18	0.385	0.2	0.529	0.263	0.667	0.4088	16043.1
ALB	6	19	0.308	0.273	0.611	0.476	0.462	0.426	14142.2
ALB	6	20	0.231	0.455	0.562	0.35	0.462	0.412	9792.46
ALB	6	21	0.308	0.273	0.588	0.45	0.533	0.4304	13642.5
ALB	6	22	0.308	0.273	0.55	0.588	0.643	0.4724	1397.65
ALB	6	23	0.231	0.455	0.5	0.55	0.545	0.4562	3245.15
ALB	6	24	0.467	0.6	0.667	0.632	0.75	0.6232	14638.5
ALB	6	25	0.462	0.909	0.462	0.722	0.769	0.6648	9286.45
ALB	6	26	0.308	0.4	0.706	0.529	0.75	0.5386	2666.1
ALB	6	27	0.462	0.7	0.533	0.579	0.769	0.6086	2213.59
ALB	6	28	0.429	0.417	0.467	0.235	0.583	0.4262	15106.4
ALB	6	29	0.375	0.364	0.579	0.444	0.273	0.407	6716.26
ALB	6	30	0.571	0.7	0.5	0.437	0.538	0.5492	6010
ALB	6	31	0.5	0.5	0.625	0.5	0.562	0.5374	14080.1
ALB	6	32	0.308	0.2	0.667	0.526	0.5	0.4402	6168.47
ALB	6	33	0.437	0.364	0.588	0.5	0.273	0.4324	3313.61
ALB	6	34	0.562	0.857	0.647	0.5	0.5	0.6132	3712.14
ALB	6	35	0.643	0.6	0.571	0.524	0.75	0.6176	6178.11
ALB	6	36	0.462	0.4	0.737	0.556	0.733	0.5776	16576.4
ALB	6	37	0.154	0.444	0.5	0.389	0.529	0.4032	546.26
ALB	6	38	0.231	0.9	0.692	0.625	0.714	0.6324	1230.37
ALB	6	39	0.385	0.444	0.562	0.647	0.5	0.5076	15652.4
ALB	6	40	0.571	0.364	0.417	0.562	0.667	0.5162	13737.9
ALB	6	41	0.357	0.417	0.467	0.25	0.533	0.4048	4522.17
ALB	6	42	0.231	0.364	0.25	0.353	0.857	0.411	550.364
ALB	6	43	0.286	0.273	0.4	0.471	0.733	0.4326	5277.89
ALB	6	44	0.385	0.455	0.611	0.6	0.812	0.5726	16530.3
ALB	6	45	0.154	0.556	0.5	0.562	0.769	0.5082	4131.6
ALB	6	46	0.529	0.444	0.562	0.437	0.667	0.5278	6472.87
ALB	6	47	0.5	0.429	0.467	0.444	0.333	0.4346	3778.83
ALB	6	48	0.437	0.2	0.471	0.333	0.467	0.3816	2081.39
ALB	6	49	0.462	0.1	0.647	0.421	0.667	0.4594	6135.7
ALB	6	50	0.529	0.417	0.5	0.333	0.625	0.4808	14182.8
ALB	7	8	0.333	0.455	0.412	0.5	0.562	0.4524	9091.28
ALB	7	9	0.111	0.333	0.5	0.263	0.45	0.3314	11782.7
ALB	7	10	0.571	0.455	0.611	0.647	0.6	0.5768	9974.62
ALB	7	11	0.273	0.545	0.632	0.591	0.667	0.5416	11450
ALB	7	12	0.583	0.667	0.6	0.368	0.7	0.5836	3068.11
ALB	7	13	0.615	0.4	0.444	0.5	0.526	0.497	10350.9
ALB	7	14	0.615	0.636	0.667	0.353	0.7	0.5942	6108.64
ALB	7	15	0.5	0.455	0.556	0.588	0.737	0.5672	10776.2
ALB	7	16	0.3	0.714	0.267	0.778	0.5	0.5118	13621.3
ALB	7	17	0.333	0.286	0.571	0.412	0.706	0.4616	1360.15
ALB	7	18	0.3	0.545	0.375	0.381	0.632	0.4466	4028.81
ALB	7	19	0.2	0.3	0.632	0.429	0.375	0.3872	10457.7
ALB	7	20	0.1	0.333	0.5	0.381	0.556	0.374	5147.79
ALB	7	21	0	0.455	0.437	0.476	0.526	0.3788	10756.6
ALB	7	22	0	0.3	0.421	0.611	0.611	0.3886	14250.5
ALB	7	23	0.1	0.333	0.611	0.5	0.706	0.45	16823.4
ALB	7	24	0.538	0.286	0.687	0.579	0.762	0.5704	9527.73
ALB	7	25	0.4	0.75	0.6	0.667	0.778	0.639	14762.1
ALB	7	26	0.2	0.25	0.647	0.471	0.7	0.4536	13302
ALB	7	27	0.4	0.429	0.467	0.526	0.625	0.4894	15778.6
ALB	7	28	0.5	0.455	0.4	0.278	0.722	0.471	11165.4
ALB	7	29	0.533	0.545	0.444	0.474	0.684	0.536	7191.7
ALB	7	30	0.545	0.625	0.529	0.471	0.437	0.5214	8558.15
ALB	7	31	0.571	0.545	0.562	0.524	0.474	0.5352	1712.1
ALB	7	32	0.2	0.4	0.611	0.55	0.579	0.468	7937.08
ALB	7	33	0.5	0.4	0.611	0.526	0.684	0.5442	16976.8
ALB	7	34	0.643	0.833	0.5	0.526	0.579	0.6162	17376.6
ALB	7	35	0.5	0.286	0.6	0.545	0.7	0.5262	12643.3
ALB	7	36	0.4	0	0.529	0.5	0.75	0.4358	3337.93
ALB	7	37	0.182	0.286	0.529	0.333	0.591	0.3842	13176.1
ALB	7	38	0.273	0.714	0.615	0.647	0.737	0.5972	13712.7
ALB	7	39	0.111	0.5	0.5	0.667	0.5	0.4556	2940.13
ALB	7	40	0.4	0.222	0.462	0.588	0.625	0.4594	13212.5
ALB	7	41	0.273	0.455	0.5	0.389	0.526	0.4286	11153.1
ALB	7	42	0.1	0.4	0.625	0.389	0.625	0.4278	14170.1
ALB	7	43	0.333	0.455	0.333	0.579	0.611	0.4622	8869.37
ALB	7	44	0.111	0.333	0.556	0.55	0.684	0.4468	3066.15
ALB	7	45	0.333	0.429	0.538	0.588	0.778	0.5332	17783.4
ALB	7	46	0.5	0.286	0.4	0.471	0.706	0.4726	7339.89
ALB	7	47	0.3	0.462	0.588	0.474	0.556	0.476	11085.1
ALB	7	48	0.385	0.545	0.5	0.278	0.389	0.4194	15679.9
ALB	7	49	0.4	0.455	0.588	0.368	0.571	0.4764	16828.1
ALB	7	50	0.6	0.3	0.526	0.364	0.444	0.4468	686.804
ALB	8	9	0.417	0.5	0.235	0.375	0.625	0.4304	2843.45
ALB	8	10	0.429	0.462	0.444	0.667	0.643	0.529	959.635
ALB	8	11	0.5	0.417	0.474	0.667	0.75	0.5616	12977.1
ALB	8	12	0.538	0.417	0.368	0.5	0.692	0.503	9815.29
ALB	8	13	0.571	0.417	0.368	0.571	0.643	0.514	1273.77
ALB	8	14	0.571	0.5	0.5	0.5	0.786	0.5714	3397.06
ALB	8	15	0.571	0.571	0.389	0.692	0.846	0.6138	1943.75
ALB	8	16	0.273	0.8	0.389	0.636	0.5	0.5196	4629.09
ALB	8	17	0.583	0.636	0.562	0.571	0.7	0.6104	10438.3
ALB	8	18	0.417	0.538	0.389	0.5	0.692	0.5072	11180.3
ALB	8	19	0.462	0.462	0.474	0.471	0.455	0.4648	12471.6
ALB	8	20	0.385	0.5	0.312	0.5	0.583	0.456	4916.52
ALB	8	21	0.333	0.462	0.526	0.529	0.643	0.4986	12192.9
ALB	8	22	0.333	0.333	0.263	0.5	0.769	0.4396	5203
ALB	8	23	0.385	0.615	0.526	0.562	0.556	0.5288	7829.43
ALB	8	24	0.6	0.5	0.588	0.571	0.867	0.6252	12526.7
ALB	8	25	0.5	0.917	0.588	0.692	0.818	0.703	10760.7
ALB	8	26	0.333	0.455	0.471	0.538	0.867	0.5328	5665.87
ALB	8	27	0.5	0.727	0.375	0.6	0.818	0.604	7088.02
ALB	8	28	0.462	0.462	0.412	0.5	0.833	0.5338	13481.9
ALB	8	29	0.4	0.417	0.368	0.429	0.667	0.4562	1913.16
ALB	8	30	0.615	0.6	0.444	0.643	0.545	0.5694	1366.05
ALB	8	31	0.429	0.538	0.556	0.667	0.667	0.5714	9302.15
ALB	8	32	0.182	0.417	0.444	0.625	0.8	0.4936	3324.15
ALB	8	33	0.357	0.538	0.526	0.687	0.667	0.555	8062.26
ALB	8	34	0.6	0.692	0.5	0.687	0.8	0.6558	8459.31
ALB	8	35	0.692	0.636	0.588	0.611	0.786	0.6626	7425.16
ALB	8	36	0.615	0.455	0.444	0.667	0.857	0.6076	11803.6
ALB	8	37	0.308	0.636	0.444	0.562	0.706	0.5312	4336.63
ALB	8	38	0.5	0.8	0.6	0.545	0.846	0.6582	4670.52
ALB	8	39	0.417	0.636	0.312	0.692	0.5	0.5114	10839.6
ALB	8	40	0.5	0.417	0.562	0.583	0.7	0.5524	13238.2
ALB	8	41	0.25	0.462	0.312	0.429	0.538	0.3982	2585.16
ALB	8	42	0.385	0.538	0.529	0.429	0.818	0.5398	5420.42
ALB	8	43	0.308	0.571	0.353	0.667	0.667	0.5132	492.037
ALB	8	44	0.417	0.5	0.55	0.625	0.769	0.5722	11803.8
ALB	8	45	0.308	0.727	0.533	0.692	0.818	0.6156	8835.39
ALB	8	46	0.357	0.5	0.312	0.417	0.7	0.4572	1756.16
ALB	8	47	0.273	0.357	0.5	0.308	0.583	0.4042	4237.45
ALB	8	48	0.357	0.538	0.333	0.5	0.667	0.479	6725.49
ALB	8	49	0.364	0.462	0.412	0.4	0.765	0.4806	9857.32
ALB	8	50	0.562	0.462	0.45	0.55	0.643	0.5334	9534.72
ALB	9	10	0.643	0.5	0.526	0.625	0.65	0.5888	1885.34
ALB	9	11	0.364	0.692	0.619	0.5	0.722	0.5794	15320.3
ALB	9	12	0.545	0.583	0.45	0.333	0.611	0.5044	12140.1
ALB	9	13	0.583	0.583	0.524	0.471	0.5	0.5322	1622.64
ALB	9	14	0.583	0.545	0.65	0.312	0.611	0.5402	5780.04
ALB	9	15	0.583	0.5	0.55	0.647	0.722	0.6004	2328.61
ALB	9	16	0.4	0.75	0.55	0.765	0.471	0.5872	2871.11
ALB	9	17	0.444	0.556	0.722	0.375	0.687	0.5568	13108.6
ALB	9	18	0.4	0.455	0.474	0.263	0.529	0.4242	13450.8
ALB	9	19	0.3	0.2	0.474	0.4	0.437	0.3622	14917.3
ALB	9	20	0.2	0.4	0.5	0.35	0.529	0.3958	7150.17
ALB	9	21	0.111	0.364	0.6	0.45	0.412	0.3874	14563.6
ALB	9	22	0.111	0.364	0.35	0.588	0.5	0.3826	3123.16
ALB	9	23	0.2	0.4	0.526	0.55	0.687	0.4726	5692.81
ALB	9	24	0.5	0.375	0.667	0.556	0.611	0.5418	15102.4
ALB	9	25	0.5	0.9	0.667	0.722	0.765	0.7108	11855.5
ALB	9	26	0.111	0.5	0.632	0.529	0.529	0.4602	5614.13
ALB	9	27	0.5	0.667	0.556	0.579	0.687	0.5978	5566.08
ALB	9	28	0.455	0.5	0.5	0.235	0.778	0.4936	15925.4
ALB	9	29	0.6	0.455	0.45	0.444	0.667	0.5232	4624.65
ALB	9	30	0.5	0.667	0.526	0.437	0.5	0.526	3269.88
ALB	9	31	0.538	0.583	0.632	0.5	0.6	0.5706	11807.4
ALB	9	32	0.3	0.455	0.526	0.444	0.556	0.4562	5834.66
ALB	9	33	0.571	0.455	0.667	0.5	0.737	0.586	6079.9
ALB	9	34	0.615	0.846	0.65	0.5	0.632	0.6486	6447.73
ALB	9	35	0.6	0.556	0.667	0.524	0.75	0.6194	8490.15
ALB	9	36	0.5	0.333	0.526	0.556	0.588	0.5006	14288
ALB	9	37	0.273	0.556	0.526	0.389	0.5	0.4488	3090.18
ALB	9	38	0.364	0.75	0.765	0.625	0.722	0.6452	2704.4
ALB	9	39	0.222	0.7	0.5	0.562	0.471	0.491	13264.7
ALB	9	40	0.5	0.3	0.722	0.562	0.687	0.5542	15280.5
ALB	9	41	0.364	0.5	0.5	0.353	0.412	0.4258	987.387
ALB	9	42	0.2	0.455	0.611	0.353	0.687	0.4612	4069.12
ALB	9	43	0.417	0.5	0.444	0.556	0.588	0.501	2941.51
ALB	9	44	0.222	0.4	0.682	0.6	0.588	0.4984	14348.4
ALB	9	45	0.417	0.667	0.706	0.562	0.765	0.6234	6746.27
ALB	9	46	0.571	0.375	0.5	0.437	0.687	0.514	4547.76
ALB	9	47	0.4	0.5	0.579	0.353	0.611	0.4886	5293.88
ALB	9	48	0.462	0.455	0.421	0.421	0.526	0.457	4762.88
ALB	9	49	0.333	0.364	0.5	0.333	0.619	0.4298	9590.66
ALB	9	50	0.667	0.364	0.524	0.333	0.412	0.46	12175.3
ALB	10	11	0.385	0.273	0.579	0.571	0.462	0.454	13771.6
ALB	10	12	0.273	0.273	0.294	0.571	0.533	0.3888	10544.7
ALB	10	13	0.333	0.417	0.474	0.4	0.5	0.4248	427.013
ALB	10	14	0.333	0.2	0.529	0.455	0.533	0.41	4110.75
ALB	10	15	0.462	0.571	0.579	0.818	0.571	0.6002	1633
ALB	10	16	0.417	0.8	0.65	0.9	0.562	0.6658	3926.65
ALB	10	17	0.583	0.5	0.765	0.545	0.8	0.6386	11313.6
ALB	10	18	0.643	0.538	0.5	0.647	0.625	0.5906	11891.2
ALB	10	19	0.571	0.462	0.579	0.842	0.533	0.5974	13301.5
ALB	10	20	0.6	0.5	0.529	0.722	0.533	0.5768	5579.83
ALB	10	21	0.571	0.571	0.7	0.833	0.588	0.6526	12995.9
ALB	10	22	0.571	0.462	0.524	0.6	0.687	0.5688	4434.31
ALB	10	23	0.6	0.5	0.7	0.812	0.615	0.6454	7080.87
ALB	10	24	0.6	0.636	0.778	0.857	0.778	0.7298	13402.1
ALB	10	25	0.615	0.917	0.625	0.917	0.714	0.7576	11101.6
ALB	10	26	0.571	0.583	0.667	0.846	0.706	0.6746	5530.01
ALB	10	27	0.5	0.727	0.5	0.786	0.714	0.6454	6511.6
ALB	10	28	0.333	0.333	0.437	0.571	0.643	0.4634	14312.2
ALB	10	29	0.286	0.273	0.474	0.615	0.385	0.4066	2784.55
ALB	10	30	0.714	0.727	0.556	0.636	0.6	0.6466	1707.92
ALB	10	31	0.308	0.1	0.5	0.667	0.611	0.4372	10105.4
ALB	10	32	0.462	0.273	0.267	0.5	0.562	0.4128	4144.5
ALB	10	33	0.357	0.273	0.471	0.583	0.385	0.4138	7360.77
ALB	10	34	0.25	0.583	0.437	0.583	0.562	0.483	7752.48
ALB	10	35	0.692	0.636	0.625	0.833	0.625	0.6822	7725.39
ALB	10	36	0.714	0.455	0.7	0.667	0.687	0.6446	12602.3
ALB	10	37	0.533	0.5	0.556	0.733	0.579	0.5802	3761.93
ALB	10	38	0.687	0.909	0.643	0.667	0.667	0.7146	3916.24
ALB	10	39	0.538	0.636	0.611	0.818	0.467	0.614	11612.5
ALB	10	40	0.615	0.417	0.6	0.818	0.714	0.6328	13926.6
ALB	10	41	0.5	0.333	0.529	0.714	0.588	0.5328	1695.57
ALB	10	42	0.6	0.417	0.647	0.714	0.8	0.6356	4858.35
ALB	10	43	0.625	0.462	0.632	0.857	0.765	0.6682	1108.87
ALB	10	44	0.643	0.615	0.65	0.875	0.895	0.7356	12627.3
ALB	10	45	0.533	0.6	0.667	0.818	0.714	0.6664	8108.17
ALB	10	46	0.357	0.5	0.437	0.636	0.714	0.5288	2676.75
ALB	10	47	0.417	0.357	0.437	0.615	0.429	0.451	4462.92
ALB	10	48	0.467	0.538	0.444	0.667	0.529	0.529	6015.02
ALB	10	49	0.5	0.462	0.684	0.75	0.7	0.6192	9718.89
ALB	10	50	0.562	0.182	0.55	0.684	0.667	0.529	10396.2
ALB	11	12	0.364	0.2	0.421	0.444	0.5	0.3858	14493.5
ALB	11	13	0.417	0.364	0.333	0.4	0.571	0.417	13825.2
ALB	11	14	0.417	0.3	0.267	0.437	0.5	0.3842	12972.5
ALB	11	15	0.538	0.733	0.444	0.833	0.769	0.6634	13045.2
ALB	11	16	0.364	0.9	0.526	0.882	0.733	0.681	14930.3
ALB	11	17	0.4	0.6	0.533	0.588	1	0.6242	12007.1
ALB	11	18	0.5	0.615	0.353	0.524	0.8	0.5584	15447.5
ALB	11	19	0.417	0.643	0.667	0.636	0.714	0.6154	1034.07
ALB	11	20	0.333	0.692	0.375	0.652	0.714	0.5532	13510
ALB	11	21	0.273	0.538	0.579	0.619	0.75	0.5518	807.527
ALB	11	22	0.273	0.538	0.476	0.778	0.692	0.5514	15632.6
ALB	11	23	0.333	0.692	0.579	0.773	0.727	0.6208	17125.2
ALB	11	24	0.571	0.727	0.722	0.737	0.8	0.7114	2318.12
ALB	11	25	0.583	0.909	0.647	0.833	0.923	0.779	7682.72
ALB	11	26	0.417	0.545	0.437	0.85	0.8	0.6098	12028.3
ALB	11	27	0.455	0.818	0.529	0.75	0.833	0.677	15298
ALB	11	28	0.538	0.538	0.471	0.526	0.636	0.5418	1092.93
ALB	11	29	0.467	0.364	0.421	0.556	0.455	0.4526	12308.1
ALB	11	30	0.692	0.818	0.5	0.647	0.692	0.6698	13758.4
ALB	11	31	0.385	0.364	0.529	0.526	0.5	0.4608	13135.5
ALB	11	32	0.417	0.364	0.5	0.375	0.417	0.4146	9652.98
ALB	11	33	0.429	0.5	0.412	0.437	0.3	0.4156	16859.6
ALB	11	34	0.462	0.545	0.375	0.529	0.417	0.4656	17162.7
ALB	11	35	0.545	0.6	0.562	0.619	0.875	0.6402	8708.12
ALB	11	36	0.455	0.545	0.312	0.667	0.786	0.553	14285.1
ALB	11	37	0.385	0.6	0.579	0.714	0.722	0.6	14158.8
ALB	11	38	0.462	0.9	0.75	0.75	0.769	0.7262	15242.4
ALB	11	39	0.2	0.444	0.632	0.687	0.643	0.5212	14290.3
ALB	11	40	0.455	0.615	0.625	0.833	0.833	0.6722	2367.72
ALB	11	41	0.462	0.538	0.471	0.632	0.75	0.5706	15460.2
ALB	11	42	0.333	0.615	0.588	0.7	0.833	0.6138	14475.4
ALB	11	43	0.5	0.538	0.5	0.737	0.867	0.6284	13239
ALB	11	44	0.364	0.583	0.6	0.762	0.937	0.6492	13776.5
ALB	11	45	0.5	0.7	0.6	0.833	0.833	0.6932	17603.9
ALB	11	46	0.533	0.6	0.556	0.789	0.727	0.641	12073.5
ALB	11	47	0.364	0.308	0.471	0.471	0.5	0.4228	10576.4
ALB	11	48	0.429	0.615	0.474	0.6	0.687	0.561	16115
ALB	11	49	0.583	0.538	0.471	0.6	0.842	0.6068	12672.7
ALB	11	50	0.625	0.417	0.333	0.35	0.667	0.4784	12071.1
ALB	12	13	0.3	0.5	0.4	0.4	0.429	0.4058	10962.9
ALB	12	14	0.111	0.111	0.353	0.214	0.667	0.2912	6436.4
ALB	12	15	0.692	0.733	0.421	0.687	0.5	0.6066	11706
ALB	12	16	0.545	0.9	0.571	0.643	0.5	0.6318	14438.2
ALB	12	17	0.6	0.727	0.667	0.5	0.857	0.6702	3065.44
ALB	12	18	0.667	0.615	0.421	0.45	0.75	0.5806	1392.84
ALB	12	19	0.583	0.643	0.5	0.571	0.571	0.5736	13509.7
ALB	12	20	0.615	0.692	0.444	0.524	0.462	0.5474	4990.81
ALB	12	21	0.583	0.538	0.619	0.619	0.533	0.5784	13786
ALB	12	22	0.583	0.538	0.455	0.533	0.538	0.5294	14977.9
ALB	12	23	0.615	0.692	0.682	0.579	0.667	0.647	17622.2
ALB	12	24	0.714	0.727	0.684	0.737	0.667	0.7058	12595.4
ALB	12	25	0.75	1	0.611	0.765	0.769	0.779	17251.7
ALB	12	26	0.583	0.667	0.579	0.647	0.571	0.6094	14828.2
ALB	12	27	0.636	0.917	0.412	0.611	0.667	0.6486	16867.1
ALB	12	28	0.455	0.538	0.353	0.353	0.692	0.4782	14230.6
ALB	12	29	0.385	0.2	0.4	0.471	0.643	0.4198	7954.63
ALB	12	30	0.636	0.818	0.474	0.467	0.643	0.6076	8898.99
ALB	12	31	0.273	0.364	0.412	0.444	0.647	0.428	1360.15
ALB	12	32	0.583	0.364	0.294	0.375	0.5	0.4232	9664.88
ALB	12	33	0.462	0.5	0.474	0.437	0.273	0.4292	17875.7
ALB	12	34	0.364	0.545	0.444	0.437	0.385	0.435	18271.8
ALB	12	35	0.727	0.727	0.611	0.619	0.75	0.6868	14796.2
ALB	12	36	0.75	0.667	0.55	0.588	0.538	0.6186	2423.65
ALB	12	37	0.643	0.727	0.55	0.5	0.529	0.5898	14137.4
ALB	12	38	0.714	0.9	0.625	0.571	0.5	0.662	14455.5
ALB	12	39	0.545	0.6	0.526	0.6	0.5	0.5542	1304.02
ALB	12	40	0.636	0.615	0.588	0.687	0.667	0.6386	16189.2
ALB	12	41	0.615	0.538	0.444	0.375	0.533	0.501	11333.6
ALB	12	42	0.615	0.615	0.632	0.471	0.857	0.638	15205
ALB	12	43	0.643	0.538	0.474	0.588	0.812	0.611	9465.31
ALB	12	44	0.667	0.692	0.571	0.7	0.882	0.7024	2765.86
ALB	12	45	0.643	0.818	0.562	0.687	0.769	0.6958	18641.2
ALB	12	46	0.462	0.6	0.444	0.562	0.667	0.547	8212.8
ALB	12	47	0.4	0.429	0.526	0.375	0.462	0.4384	12726.5
ALB	12	48	0.571	0.615	0.278	0.353	0.647	0.4928	16535.7
ALB	12	49	0.5	0.538	0.6	0.526	0.667	0.5662	18676.6
ALB	12	50	0.75	0.417	0.476	0.35	0.706	0.5398	2529.58
ALB	13	14	0.364	0.455	0.353	0.25	0.625	0.4094	4527.18
ALB	13	15	0.615	0.643	0.421	0.692	0.571	0.5884	1310.84
ALB	13	16	0.583	0.9	0.333	0.846	0.467	0.6258	3500.37
ALB	13	17	0.636	0.6	0.588	0.462	0.714	0.6	11694
ALB	13	18	0.786	0.714	0.333	0.579	0.706	0.6236	12311.9
ALB	13	19	0.615	0.538	0.571	0.632	0.533	0.5778	13384
ALB	13	20	0.643	0.583	0.353	0.65	0.429	0.5316	6002.9
ALB	13	21	0.615	0.538	0.55	0.684	0.588	0.595	13057
ALB	13	22	0.615	0.538	0.381	0.615	0.5	0.5298	4014.98
ALB	13	23	0.643	0.583	0.55	0.647	0.615	0.6076	6660.19
ALB	13	24	0.643	0.6	0.611	0.667	0.706	0.6454	13526
ALB	13	25	0.667	0.8	0.529	0.786	0.714	0.6992	10910.8
ALB	13	26	0.5	0.545	0.579	0.733	0.706	0.6126	5190.96
ALB	13	27	0.545	0.7	0.412	0.687	0.714	0.6116	6086.84
ALB	13	28	0.5	0.538	0.353	0.5	0.643	0.5068	14394.1
ALB	13	29	0.429	0.615	0.4	0.429	0.6	0.4946	3160.08
ALB	13	30	0.667	0.818	0.474	0.538	0.6	0.6194	2134.65
ALB	13	31	0.333	0.5	0.412	0.5	0.529	0.4548	10510
ALB	13	32	0.615	0.5	0.474	0.308	0.562	0.4918	4251.64
ALB	13	33	0.5	0.5	0.389	0.25	0.385	0.4048	6935.6
ALB	13	34	0.417	0.667	0.526	0.5	0.357	0.4934	7327.76
ALB	13	35	0.636	0.444	0.611	0.684	0.706	0.6162	7527.38
ALB	13	36	0.667	0.4	0.55	0.462	0.6	0.5358	13008.5
ALB	13	37	0.571	0.6	0.389	0.647	0.579	0.5572	3339.81
ALB	13	38	0.733	0.778	0.625	0.545	0.571	0.6504	3494.3
ALB	13	39	0.583	0.6	0.526	0.692	0.467	0.5736	12024
ALB	13	40	0.769	0.5	0.5	0.692	0.714	0.635	13907.4
ALB	13	41	0.643	0.538	0.353	0.533	0.5	0.5134	1661.41
ALB	13	42	0.643	0.615	0.471	0.625	0.8	0.6308	4435.81
ALB	13	43	0.75	0.538	0.389	0.75	0.765	0.6384	1508.06
ALB	13	44	0.692	0.455	0.571	0.706	0.833	0.6514	13027
ALB	13	45	0.667	0.7	0.562	0.692	0.714	0.667	7685.32
ALB	13	46	0.5	0.6	0.353	0.643	0.714	0.562	3026.74
ALB	13	47	0.583	0.308	0.444	0.429	0.429	0.4386	4258.61
ALB	13	48	0.6	0.714	0.278	0.5	0.529	0.5242	5590.09
ALB	13	49	0.545	0.643	0.444	0.588	0.556	0.5552	9367.11
ALB	13	50	0.687	0.417	0.316	0.474	0.667	0.5122	10782.4
ALB	14	15	0.714	0.714	0.375	0.615	0.875	0.6586	5322.44
ALB	14	16	0.583	0.889	0.632	0.769	0.765	0.7276	8005.2
ALB	14	17	0.636	0.7	0.462	0.385	0.933	0.6232	7394.16
ALB	14	18	0.692	0.692	0.375	0.444	0.667	0.574	7791.28
ALB	14	19	0.615	0.615	0.7	0.579	0.667	0.6352	12245.4
ALB	14	20	0.643	0.667	0.286	0.526	0.667	0.5578	1535.26
ALB	14	21	0.615	0.615	0.529	0.632	0.706	0.6194	12165.3
ALB	14	22	0.615	0.615	0.571	0.538	0.538	0.5754	8541.98
ALB	14	23	0.643	0.667	0.75	0.588	0.667	0.663	11185.8
ALB	14	24	0.733	0.7	0.6	0.687	0.667	0.6774	11932.9
ALB	14	25	0.769	1	0.5	0.714	0.857	0.768	12743.9
ALB	14	26	0.615	0.75	0.467	0.667	0.667	0.6332	8775.47
ALB	14	27	0.667	0.909	0.467	0.625	0.769	0.6874	10482.3
ALB	14	28	0.5	0.5	0.4	0.333	0.583	0.4632	13212.5
ALB	14	29	0.308	0.3	0.444	0.357	0.417	0.3652	1661.97
ALB	14	30	0.667	0.8	0.529	0.462	0.733	0.6382	2510.23
ALB	14	31	0.333	0.3	0.357	0.437	0.562	0.3978	6027.74
ALB	14	32	0.615	0.455	0.529	0.357	0.385	0.4682	4428.64
ALB	14	33	0.5	0.455	0.333	0.308	0.538	0.4268	11444.1
ALB	14	34	0.273	0.5	0.4	0.429	0.6	0.4404	11839.3
ALB	14	35	0.75	0.7	0.6	0.632	0.824	0.7012	9678.66
ALB	14	36	0.769	0.636	0.437	0.5	0.733	0.615	8513.17
ALB	14	37	0.667	0.7	0.529	0.5	0.611	0.6014	7733.49
ALB	14	38	0.733	0.889	0.615	0.455	0.8	0.6984	8019.12
ALB	14	39	0.583	0.7	0.588	0.5	0.6	0.5942	7507.02
ALB	14	40	0.667	0.583	0.571	0.615	0.857	0.6586	13821.3
ALB	14	41	0.643	0.5	0.5	0.357	0.625	0.525	5071.69
ALB	14	42	0.643	0.583	0.533	0.467	0.857	0.6166	8814.96
ALB	14	43	0.667	0.615	0.611	0.6	0.812	0.661	3029.6
ALB	14	44	0.692	0.667	0.556	0.722	0.733	0.674	8568.64
ALB	14	45	0.667	0.8	0.417	0.615	0.769	0.6536	12205.7
ALB	14	46	0.5	0.556	0.5	0.571	0.857	0.5968	1992.4
ALB	14	47	0.455	0.5	0.5	0.357	0.462	0.4548	6921.59
ALB	14	48	0.6	0.692	0.412	0.333	0.647	0.5368	10102.2
ALB	14	49	0.545	0.615	0.4	0.529	0.737	0.5652	12869
ALB	14	50	0.765	0.364	0.353	0.421	0.625	0.5056	6439.94
ALB	15	16	0.455	0.8	0.444	0.667	0.417	0.5566	2849.08
ALB	15	17	0.333	0.636	0.533	0.583	0.727	0.5624	12134.7
ALB	15	18	0.692	0.417	0.444	0.667	0.714	0.5868	13080.5
ALB	15	19	0.5	0.333	0.526	0.562	0.615	0.5072	12681.8
ALB	15	20	0.538	0.2	0.375	0.588	0.5	0.4402	6850.47
ALB	15	21	0.5	0.462	0.5	0.533	0.571	0.5132	12299.8
ALB	15	22	0.5	0.333	0.545	0.636	0.692	0.5412	3507.38
ALB	15	23	0.538	0.364	0.65	0.571	0.727	0.57	6047.33
ALB	15	24	0.538	0.5	0.467	0.455	0.8	0.552	12939.6
ALB	15	25	0.545	0.7	0.467	0.444	0.6	0.5512	9669.63
ALB	15	26	0.5	0.583	0.529	0.222	0.615	0.4898	3897.03
ALB	15	27	0.4	0.6	0.333	0.364	0.6	0.4594	5164.63
ALB	15	28	0.5	0.462	0.471	0.6	0.846	0.5758	13685.6
ALB	15	29	0.625	0.643	0.5	0.733	0.867	0.6736	3752.22
ALB	15	30	0.667	0.6	0.579	0.545	0.692	0.6166	3199.3
ALB	15	31	0.667	0.643	0.611	0.687	0.833	0.6882	11125.7
ALB	15	32	0.5	0.538	0.579	0.733	0.733	0.6166	3782.67
ALB	15	33	0.6	0.538	0.412	0.714	0.583	0.5694	6221.11
ALB	15	34	0.538	0.867	0.471	0.8	0.643	0.6638	6620.86
ALB	15	35	0.5	0.5	0.562	0.533	0.615	0.542	6285.38
ALB	15	36	0.667	0.455	0.412	0.3	0.583	0.4834	13624.6
ALB	15	37	0.462	0.5	0.5	0.462	0.562	0.4972	2436.29
ALB	15	38	0.643	0.8	0.667	0.375	0.4	0.577	2971.6
ALB	15	39	0.455	0.75	0.632	0.6	0.538	0.595	12691.7
ALB	15	40	0.667	0.273	0.533	0.25	0.6	0.4646	12954.5
ALB	15	41	0.538	0.462	0.556	0.538	0.571	0.533	2791.65
ALB	15	42	0.538	0.417	0.667	0.538	0.833	0.5986	3499.63
ALB	15	43	0.667	0.571	0.5	0.455	0.786	0.5958	2386.17
ALB	15	44	0.583	0.5	0.526	0.417	0.867	0.5786	13591.3
ALB	15	45	0.571	0.727	0.5	0.444	0.727	0.5938	7017.02
ALB	15	46	0.6	0.636	0.375	0.545	0.6	0.5512	3512.97
ALB	15	47	0.583	0.647	0.632	0.733	0.714	0.6618	3030.22
ALB	15	48	0.6	0.538	0.474	0.6	0.687	0.5798	4907.72
ALB	15	49	0.545	0.462	0.471	0.5	0.706	0.5368	8087.11
ALB	15	50	0.5	0.462	0.5	0.632	0.75	0.5688	11265.7
ALB	16	17	0.444	0.6	0.533	0.846	0.583	0.6012	14979
ALB	16	18	0.4	0.778	0.444	0.778	0.6	0.6	15796.5
ALB	16	19	0.455	0.8	0.526	0.765	0.385	0.5862	14715.5
ALB	16	20	0.364	0.75	0.471	0.778	0.25	0.5226	9497.96
ALB	16	21	0.3	0.909	0.5	0.75	0.357	0.5632	14241.9
ALB	16	22	0.3	0.8	0.4	0.556	0.667	0.5446	728.989
ALB	16	23	0.364	0.75	0.5	0.714	0.455	0.5566	3209.04
ALB	16	24	0.5	0.6	0.647	0.75	0.687	0.6368	15151.7
ALB	16	25	0.5	1	0.562	0.8	0.583	0.689	10133
ALB	16	26	0.3	0.714	0.529	0.6	0.6	0.5486	3515.74
ALB	16	27	0.333	0.5	0.437	0.667	0.583	0.504	2700.46
ALB	16	28	0.455	0.8	0.471	0.733	0.714	0.6346	15692.3
ALB	16	29	0.5	0.778	0.5	0.786	0.667	0.6462	6527.37
ALB	16	30	0.75	0.8	0.5	0.727	0.571	0.6696	5629.1
ALB	16	31	0.417	0.9	0.611	0.733	0.667	0.6656	13923.8
ALB	16	32	0.111	0.778	0.65	0.867	0.706	0.6224	6398.32
ALB	16	33	0.333	0.778	0.579	0.857	0.571	0.6236	3439.26
ALB	16	34	0.5	1	0.556	0.769	0.625	0.69	3834.12
ALB	16	35	0.6	0.833	0.562	0.75	0.6	0.669	6972.84
ALB	16	36	0.5	0.714	0.579	0.75	0.462	0.601	16425.4
ALB	16	37	0.273	0.6	0.5	0.714	0.375	0.4924	776.981
ALB	16	38	0.5	1	0.667	0.625	0.417	0.6418	355.106
ALB	16	39	0.222	0.833	0.471	0.667	0.308	0.5002	15468.3
ALB	16	40	0.333	0.778	0.429	0.667	0.455	0.5324	14450.2
ALB	16	41	0.2	0.8	0.375	0.692	0.231	0.4596	3853.26
ALB	16	42	0.364	0.778	0.5	0.692	0.786	0.624	1257.06
ALB	16	43	0.417	0.8	0.2	0.636	0.571	0.5248	4976.36
ALB	16	44	0.4	0.889	0.526	0.692	0.667	0.6348	16410.4
ALB	16	45	0.273	0.5	0.5	0.8	0.583	0.5312	4206.3
ALB	16	46	0.462	0.6	0.375	0.6	0.455	0.4984	6320.03
ALB	16	47	0.222	0.846	0.556	0.692	0.6	0.5832	4354.05
ALB	16	48	0.333	0.9	0.474	0.733	0.5	0.588	2097.45
ALB	16	49	0.333	0.8	0.632	0.733	0.611	0.6218	6992.57
ALB	16	50	0.571	0.8	0.5	0.737	0.467	0.615	14102.8
ALB	17	18	0.6	0.6	0.429	0.412	0.667	0.5416	3563.55
ALB	17	19	0.333	0.5	0.778	0.556	0.545	0.5424	10988.6
ALB	17	20	0.4	0.556	0.333	0.5	0.545	0.4668	6328.7
ALB	17	21	0.333	0.636	0.385	0.529	0.615	0.4996	11362.3
ALB	17	22	0.333	0.5	0.632	0.615	0.846	0.5852	15605.6
ALB	17	23	0.4	0.556	0.687	0.647	0.8	0.618	18182.1
ALB	17	24	0.667	0.571	0.583	0.571	0.857	0.6498	9944.65
ALB	17	25	0.556	0.857	0.455	0.692	0.5	0.612	15856.5
ALB	17	26	0.5	0.5	0.417	0.538	0.769	0.5448	14638.1
ALB	17	27	0.375	0.5	0.417	0.5	0.667	0.4918	17137.3
ALB	17	28	0.636	0.5	0.571	0.286	0.818	0.5622	11608.8
ALB	17	29	0.643	0.6	0.588	0.429	0.846	0.6212	8533.96
ALB	17	30	0.556	0.714	0.6	0.273	0.75	0.5786	9868.66
ALB	17	31	0.692	0.6	0.643	0.588	0.944	0.6934	1987.69
ALB	17	32	0.5	0.444	0.765	0.429	0.937	0.615	9269.14
ALB	17	33	0.615	0.444	0.5	0.5	0.929	0.5976	18336.8
ALB	17	34	0.667	0.909	0.571	0.5	0.937	0.7168	18736.7
ALB	17	35	0.286	0.571	0.455	0.611	0.667	0.518	13870.1
ALB	17	36	0.556	0.286	0.5	0.462	0.75	0.5108	2316.25
ALB	17	37	0.455	0.333	0.6	0.467	0.687	0.5084	14536.1
ALB	17	38	0.545	1	0.6	0.545	0.727	0.6834	15068
ALB	17	39	0.25	0.571	0.571	0.583	0.786	0.5522	2363.06
ALB	17	40	0.556	0.444	0.545	0.455	0.5	0.5	13912.5
ALB	17	41	0.545	0.5	0.571	0.429	0.615	0.532	12457.6
ALB	17	42	0.4	0.444	0.615	0.308	0.909	0.5352	15530
ALB	17	43	0.583	0.5	0.5	0.571	0.636	0.558	10206.5
ALB	17	44	0.444	0.556	0.429	0.625	0.75	0.5608	1897.6
ALB	17	45	0.583	0.2	0.333	0.583	0.8	0.4998	19143.2
ALB	17	46	0.615	0.333	0.667	0.417	0.8	0.5664	8689.9
ALB	17	47	0.444	0.615	0.667	0.625	0.769	0.624	12414.5
ALB	17	48	0.615	0.6	0.647	0.588	0.643	0.6186	17039.3
ALB	17	49	0.556	0.5	0.571	0.588	0.667	0.5764	18111.7
ALB	17	50	0.615	0.5	0.5	0.55	0.714	0.5758	976.166
ALB	18	19	0.3	0.273	0.667	0.5	0.462	0.4404	14443.7
ALB	18	20	0.364	0.3	0.267	0.3	0.462	0.3386	6317.61
ALB	18	21	0.3	0.273	0.312	0.316	0.625	0.3652	14768.4
ALB	18	22	0.3	0.273	0.4	0.611	0.643	0.4454	16325.5
ALB	18	23	0.364	0.455	0.579	0.636	0.769	0.5606	18971.9
ALB	18	24	0.5	0.6	0.562	0.579	0.667	0.5816	13454.3
ALB	18	25	0.5	0.909	0.467	0.667	0.667	0.642	18545.9
ALB	18	26	0.455	0.545	0.437	0.556	0.667	0.532	16221
ALB	18	27	0.5	0.7	0.333	0.6	0.667	0.56	18243.9
ALB	18	28	0.583	0.417	0.143	0.176	0.583	0.3804	15110.3
ALB	18	29	0.5	0.5	0.235	0.55	0.643	0.4856	9331.68
ALB	18	30	0.636	0.556	0.412	0.471	0.643	0.5436	10229.7
ALB	18	31	0.643	0.615	0.529	0.591	0.722	0.62	2475.88
ALB	18	32	0.3	0.364	0.5	0.474	0.687	0.465	11047.6
ALB	18	33	0.571	0.5	0.412	0.6	0.812	0.579	19235.4
ALB	18	34	0.714	0.857	0.471	0.6	0.765	0.6814	19630.6
ALB	18	35	0.727	0.6	0.467	0.4	0.571	0.553	16150.3
ALB	18	36	0.333	0.545	0.312	0.579	0.538	0.4614	1887.88
ALB	18	37	0.417	0.444	0.412	0.421	0.529	0.4446	15508.9
ALB	18	38	0.2	0.9	0.571	0.647	0.615	0.5866	15806.1
ALB	18	39	0.4	0.6	0.471	0.588	0.687	0.5492	1201.28
ALB	18	40	0.333	0.364	0.533	0.588	0.545	0.4726	17240.9
ALB	18	41	0.364	0.417	0.471	0.389	0.429	0.414	12622
ALB	18	42	0.2	0.364	0.588	0.294	0.857	0.4606	16580.1
ALB	18	43	0.273	0.417	0.412	0.412	0.643	0.4314	10820.4
ALB	18	44	0.4	0.455	0.444	0.55	0.643	0.4984	2435.16
ALB	18	45	0.273	0.7	0.5	0.588	0.545	0.5212	19995.6
ALB	18	46	0.571	0.6	0.471	0.471	0.667	0.556	9595
ALB	18	47	0.4	0.533	0.471	0.474	0.571	0.4898	14116.9
ALB	18	48	0.462	0.2	0.389	0.45	0.647	0.4296	17893.4
ALB	18	49	0.5	0.1	0.471	0.368	0.588	0.4054	20062.1
ALB	18	50	0.571	0.538	0.235	0.286	0.429	0.4118	3380.95
ALB	19	20	0.273	0.2	0.632	0.35	0.333	0.3576	12704.7
ALB	19	21	0.2	0.182	0.65	0.278	0.308	0.3236	740.27
ALB	19	22	0.2	0.182	0.545	0.667	0.538	0.4264	15429.3
ALB	19	23	0.273	0.364	0.579	0.55	0.667	0.4866	17056.4
ALB	19	24	0.538	0.5	0.789	0.375	0.667	0.5738	1346.18
ALB	19	25	0.4	0.818	0.562	0.647	0.667	0.6188	8168.63
ALB	19	26	0.364	0.455	0.611	0.437	0.571	0.4876	11974.5
ALB	19	27	0.4	0.6	0.529	0.5	0.4	0.4858	15264.8
ALB	19	28	0.5	0.333	0.632	0.5	0.692	0.5314	1010.74
ALB	19	29	0.429	0.538	0.636	0.444	0.643	0.538	11678.9
ALB	19	30	0.4	0.6	0.65	0.529	0.273	0.4904	13175.9
ALB	19	31	0.667	0.538	0.684	0.571	0.722	0.6364	12150.3
ALB	19	32	0.364	0.417	0.5	0.6	0.6	0.4962	9158.97
ALB	19	33	0.6	0.417	0.65	0.65	0.643	0.592	16825.6
ALB	19	34	0.643	0.867	0.7	0.65	0.687	0.7094	17144
ALB	19	35	0.5	0.5	0.647	0.368	0.667	0.5364	8803.78
ALB	19	36	0.4	0.3	0.714	0.471	0.643	0.5056	13261
ALB	19	37	0.333	0.5	0.5	0.474	0.437	0.4488	13952.4
ALB	19	38	0.273	0.8	0.824	0.625	0.615	0.6274	15015.5
ALB	19	39	0.3	0.636	0.632	0.647	0.385	0.52	13281.3
ALB	19	40	0.545	0.1	0.706	0.562	0.4	0.4626	3303.15
ALB	19	41	0.417	0.333	0.556	0.444	0.429	0.4358	14996.5
ALB	19	42	0.1	0.273	0.667	0.444	0.667	0.4302	14343.4
ALB	19	43	0.333	0.462	0.5	0.556	0.417	0.4536	12703.9
ALB	19	44	0.3	0.2	0.727	0.444	0.643	0.4628	12749.5
ALB	19	45	0.333	0.6	0.687	0.647	0.667	0.5868	17590.2
ALB	19	46	0.5	0.5	0.471	0.611	0.545	0.5254	11463.3
ALB	19	47	0.455	0.467	0.7	0.444	0.462	0.5056	10372.4
ALB	19	48	0.5	0.273	0.474	0.5	0.357	0.4208	16012.1
ALB	19	49	0.4	0.182	0.632	0.421	0.588	0.4446	12960.1
ALB	19	50	0.5	0.333	0.696	0.409	0.429	0.4734	11071.3
ALB	20	21	0.1	0.364	0.333	0.316	0.429	0.3084	12710.7
ALB	20	22	0.1	0.2	0.421	0.684	0.538	0.3886	10012.2
ALB	20	23	0	0.222	0.611	0.636	0.545	0.4028	12659.6
ALB	20	24	0.571	0.375	0.5	0.5	0.667	0.5226	12236.1
ALB	20	25	0.455	0.778	0.385	0.667	0.545	0.566	13987.1
ALB	20	26	0.273	0.5	0.357	0.471	0.571	0.4344	10295.1
ALB	20	27	0.455	0.5	0.357	0.526	0.545	0.4766	12004.5
ALB	20	28	0.538	0.364	0.4	0.368	0.692	0.4724	13632.1
ALB	20	29	0.562	0.583	0.353	0.55	0.538	0.5172	3185.97
ALB	20	30	0.583	0.5	0.529	0.556	0.538	0.5412	3912.3
ALB	20	31	0.6	0.583	0.467	0.591	0.722	0.5926	4746.81
ALB	20	32	0.273	0.455	0.529	0.55	0.687	0.4988	5714.91
ALB	20	33	0.533	0.455	0.437	0.667	0.538	0.526	12936.5
ALB	20	34	0.667	0.846	0.5	0.6	0.6	0.6426	13329.7
ALB	20	35	0.545	0.375	0.385	0.4	0.571	0.4552	11029.2
ALB	20	36	0.455	0.333	0.437	0.579	0.417	0.4442	7177.92
ALB	20	37	0.091	0.375	0.437	0.333	0.437	0.3346	9251.39
ALB	20	38	0.182	0.75	0.5	0.647	0.364	0.4886	9496.04
ALB	20	39	0.2	0.7	0.4	0.667	0.385	0.4704	6128.05
ALB	20	40	0.455	0.111	0.462	0.588	0.4	0.4032	14578.5
ALB	20	41	0.333	0.364	0.5	0.389	0.167	0.3506	6360.65
ALB	20	42	0.182	0.3	0.533	0.389	0.857	0.4522	10336.9
ALB	20	43	0.25	0.5	0.437	0.5	0.643	0.466	4526.42
ALB	20	44	0.2	0.4	0.375	0.55	0.733	0.4516	7293.3
ALB	20	45	0.25	0.667	0.417	0.588	0.545	0.4934	13688
ALB	20	46	0.533	0.556	0.4	0.556	0.545	0.518	3503.73
ALB	20	47	0.364	0.6	0.4	0.474	0.571	0.4818	8393.96
ALB	20	48	0.429	0.455	0.412	0.368	0.562	0.4452	11591.8
ALB	20	49	0.455	0.364	0.4	0.368	0.588	0.435	14363.9
ALB	20	50	0.625	0.364	0.25	0.364	0.429	0.4064	5353.3
ALB	21	22	0	0.182	0.45	0.722	0.6	0.3908	14949.5
ALB	21	23	0.1	0.5	0.632	0.6	0.615	0.4894	16506.3
ALB	21	24	0.538	0.636	0.429	0.333	0.533	0.4938	2043.18
ALB	21	25	0.4	0.818	0.308	0.533	0.615	0.5348	7435.89
ALB	21	26	0.2	0.455	0.5	0.4	0.429	0.3968	11413.9
ALB	21	27	0.4	0.727	0.4	0.471	0.5	0.4996	14696.7
ALB	21	28	0.5	0.462	0.437	0.389	0.733	0.5042	1488.09
ALB	21	29	0.533	0.538	0.474	0.579	0.687	0.5622	11504.1
ALB	21	30	0.545	0.727	0.556	0.5	0.5	0.5656	12960.4
ALB	21	31	0.571	0.643	0.667	0.682	0.81	0.6746	12430.9
ALB	21	32	0.2	0.417	0.7	0.579	0.647	0.5086	8869.3
ALB	21	33	0.5	0.538	0.556	0.7	0.687	0.5962	16258.7
ALB	21	34	0.643	0.867	0.611	0.762	0.722	0.721	16570.2
ALB	21	35	0.5	0.5	0.429	0.125	0.625	0.4358	8173.97
ALB	21	36	0.4	0.455	0.471	0.437	0.5	0.4526	13654.9
ALB	21	37	0.182	0.636	0.471	0.444	0.412	0.429	13473.6
ALB	21	38	0.273	0.8	0.643	0.6	0.571	0.5774	14549.1
ALB	21	39	0.111	0.5	0.529	0.625	0.467	0.4464	13621.7
ALB	21	40	0.4	0.273	0.5	0.533	0.5	0.4412	2686.34
ALB	21	41	0.273	0.462	0.611	0.412	0.5	0.4516	14686.8
ALB	21	42	0.1	0.417	0.647	0.412	0.714	0.458	13823.9
ALB	21	43	0.333	0.462	0.471	0.333	0.385	0.3968	12448.9
ALB	21	44	0.111	0.2	0.412	0.312	0.687	0.3444	13157.8
ALB	21	45	0.333	0.727	0.462	0.625	0.714	0.5722	17014.2
ALB	21	46	0.5	0.636	0.611	0.588	0.615	0.59	11271.5
ALB	21	47	0.3	0.467	0.611	0.5	0.625	0.5006	9889.12
ALB	21	48	0.385	0.273	0.6	0.474	0.437	0.4338	15478.5
ALB	21	49	0.4	0.182	0.529	0.389	0.556	0.4112	12270.6
ALB	21	50	0.6	0.462	0.389	0.3	0.5	0.4502	11388.1
ALB	22	23	0.1	0.364	0.524	0.687	0.636	0.4622	2647.63
ALB	22	24	0.538	0.5	0.65	0.8	0.643	0.6262	15875.3
ALB	22	25	0.4	0.818	0.65	0.75	0.75	0.6736	10668.2
ALB	22	26	0.2	0.3	0.55	0.583	0.417	0.41	4054.12
ALB	22	27	0.4	0.6	0.474	0.733	0.5	0.5414	2562.5
ALB	22	28	0.5	0.333	0.421	0.533	0.769	0.5112	16403.5
ALB	22	29	0.533	0.417	0.3	0.571	0.714	0.507	7113.91
ALB	22	30	0.545	0.6	0.368	0.583	0.5	0.5192	6112.07
ALB	22	31	0.571	0.538	0.619	0.625	0.706	0.6118	14504.3
ALB	22	32	0.2	0.273	0.524	0.667	0.462	0.4252	7115.7
ALB	22	33	0.5	0.417	0.591	0.643	0.615	0.5532	2971.74
ALB	22	34	0.643	0.867	0.571	0.733	0.571	0.677	3350.94
ALB	22	35	0.5	0.5	0.65	0.722	0.733	0.621	7575.63
ALB	22	36	0.4	0.3	0.524	0.615	0.714	0.5106	17005.4
ALB	22	37	0.182	0.5	0.524	0.6	0.588	0.4788	1476.84
ALB	22	38	0.273	0.8	0.667	0.6	0.583	0.5846	538.112
ALB	22	39	0.111	0.5	0.421	0.636	0.571	0.4478	16032.5
ALB	22	40	0.4	0.1	0.556	0.636	0.636	0.4656	15114.2
ALB	22	41	0.273	0.333	0.333	0.571	0.5	0.402	4106.05
ALB	22	42	0.1	0.273	0.526	0.571	0.75	0.444	1534
ALB	22	43	0.333	0.333	0.368	0.615	0.8	0.4898	5516.52
ALB	22	44	0.111	0.364	0.609	0.667	0.714	0.493	17005.7
ALB	22	45	0.333	0.6	0.611	0.75	0.846	0.628	3683.59
ALB	22	46	0.5	0.5	0.421	0.3	0.846	0.5134	6924.79
ALB	22	47	0.3	0.467	0.5	0.571	0.538	0.4752	5060.51
ALB	22	48	0.385	0.273	0.429	0.625	0.625	0.4674	1640.98
ALB	22	49	0.4	0.182	0.5	0.625	0.722	0.4858	7230.81
ALB	22	50	0.6	0.333	0.381	0.65	0.6	0.5128	14718.7
ALB	23	24	0.571	0.375	0.706	0.647	0.667	0.5932	17654.9
ALB	23	25	0.455	0.778	0.625	0.75	0.667	0.655	11176.3
ALB	23	26	0.273	0.5	0.588	0.533	0.667	0.5122	5096.93
ALB	23	27	0.455	0.5	0.5	0.588	0.667	0.542	1893.56
ALB	23	28	0.538	0.5	0.684	0.579	0.7	0.6002	17989.1
ALB	23	29	0.562	0.583	0.682	0.684	0.636	0.6294	9733.44
ALB	23	30	0.583	0.667	0.556	0.533	0.75	0.6178	8759.09
ALB	23	31	0.6	0.583	0.857	0.714	0.733	0.6974	17129.7
ALB	23	32	0.273	0.455	0.7	0.75	0.786	0.5928	9413.33
ALB	23	33	0.533	0.3	0.7	0.737	0.636	0.5812	622.878
ALB	23	34	0.667	0.846	0.75	0.737	0.786	0.7572	832.332
ALB	23	35	0.545	0.375	0.533	0.6	0.667	0.544	8566.09
ALB	23	36	0.455	0.333	0.632	0.562	0.636	0.5236	19631.3
ALB	23	37	0.091	0.375	0.556	0.632	0.687	0.4682	3681.59
ALB	23	38	0.182	0.75	0.882	0.538	0.6	0.5904	3166.66
ALB	23	39	0.2	0.7	0.611	0.75	0.455	0.5432	18667.8
ALB	23	40	0.455	0.3	0.687	0.571	0.667	0.536	16283.2
ALB	23	41	0.333	0.364	0.529	0.437	0.5	0.4326	6651.67
ALB	23	42	0.182	0.3	0.562	0.529	0.909	0.4964	2850.8
ALB	23	43	0.25	0.364	0.471	0.562	0.846	0.4986	8157.73
ALB	23	44	0.2	0.545	0.65	0.611	0.75	0.5512	19619.3
ALB	23	45	0.25	0.667	0.75	0.667	0.667	0.6002	1054.21
ALB	23	46	0.533	0.556	0.684	0.625	0.8	0.6396	9529
ALB	23	47	0.364	0.6	0.684	0.611	0.667	0.5852	6852.42
ALB	23	48	0.429	0.583	0.667	0.5	0.733	0.5824	1164.66
ALB	23	49	0.455	0.5	0.684	0.579	0.75	0.5936	6676.8
ALB	23	50	0.625	0.364	0.619	0.609	0.615	0.5664	17310
ALB	24	25	0.583	0.857	0.5	0.583	0.667	0.638	9334.82
ALB	24	26	0.417	0.5	0.667	0.417	0.571	0.5144	12622
ALB	24	27	0.455	0.5	0.462	0.385	0.667	0.4938	15912.4
ALB	24	28	0.538	0.636	0.6	0.588	0.583	0.589	1668.11
ALB	24	29	0.647	0.6	0.684	0.625	0.733	0.6578	11544.7
ALB	24	30	0.692	0.5	0.706	0.643	0.812	0.6706	13104.3
ALB	24	31	0.6	0.727	0.75	0.737	0.85	0.7328	11236.8
ALB	24	32	0.538	0.6	0.778	0.625	0.687	0.6456	9274.54
ALB	24	33	0.625	0.6	0.625	0.765	0.812	0.6854	17464.7
ALB	24	34	0.571	0.8	0.765	0.765	0.765	0.7332	17798.9
ALB	24	35	0.769	0.333	0.615	0.437	0.667	0.5642	9641.68
ALB	24	36	0.455	0.286	0.625	0.333	0.417	0.4232	12179.2
ALB	24	37	0.5	0.333	0.625	0.562	0.611	0.5262	14404.3
ALB	24	38	0.462	0.6	0.75	0.545	0.615	0.5944	15434.5
ALB	24	39	0.5	0.75	0.6	0.583	0.687	0.624	12274
ALB	24	40	0.583	0.444	0.583	0.455	0.769	0.5668	4645.1
ALB	24	41	0.571	0.636	0.687	0.625	0.706	0.645	15093.8
ALB	24	42	0.462	0.6	0.733	0.533	0.857	0.637	14882.8
ALB	24	43	0.6	0.636	0.625	0.667	0.733	0.6522	12711.4
ALB	24	44	0.615	0.556	0.562	0.429	0.643	0.561	11650.1
ALB	24	45	0.5	0.714	0.545	0.583	0.667	0.6018	18248.8
ALB	24	46	0.706	0.333	0.687	0.643	0.857	0.6452	11362.9
ALB	24	47	0.615	0.615	0.765	0.625	0.75	0.674	10861.6
ALB	24	48	0.625	0.727	0.667	0.667	0.722	0.6816	16576.1
ALB	24	49	0.583	0.636	0.6	0.5	0.588	0.5814	13941.7
ALB	24	50	0.429	0.5	0.611	0.55	0.533	0.5246	10110
ALB	25	26	0.4	0.75	0.571	0.4	0.667	0.5576	6620.89
ALB	25	27	0.25	0.6	0.333	0.5	0.667	0.47	9294.74
ALB	25	28	0.545	0.917	0.5	0.6	0.7	0.6524	8764.73
ALB	25	29	0.571	1	0.611	0.733	0.846	0.7522	11307.6
ALB	25	30	0.727	1	0.625	0.769	0.846	0.7934	12043.8
ALB	25	31	0.714	0.909	0.667	0.833	0.944	0.8134	16079.7
ALB	25	32	0.4	0.909	0.706	0.812	0.867	0.7388	8315.29
ALB	25	33	0.643	0.909	0.533	0.8	0.846	0.7462	10733.7
ALB	25	34	0.692	1	0.687	0.941	0.867	0.8374	10933.1
ALB	25	35	0.7	0.667	0.364	0.625	0.4	0.5512	3384.92
ALB	25	36	0.6	0.75	0.625	0.583	0.5	0.6116	18089.3
ALB	25	37	0.364	0.857	0.308	0.571	0.6	0.54	9414.67
ALB	25	38	0.455	0.75	0.636	0.556	0.444	0.5682	10488.1
ALB	25	39	0.5	0.857	0.6	0.727	0.692	0.6752	17627.7
ALB	25	40	0.6	0.8	0.455	0.444	0.667	0.5932	5907.8
ALB	25	41	0.455	0.917	0.6	0.733	0.615	0.664	12458.8
ALB	25	42	0.455	0.909	0.538	0.643	0.909	0.6908	9179.3
ALB	25	43	0.615	0.917	0.533	0.583	0.75	0.6796	11216.9
ALB	25	44	0.333	0.778	0.467	0.417	0.846	0.5682	17747.3
ALB	25	45	0.5	0.833	0.4	0.444	0.667	0.5688	11320.8
ALB	25	46	0.538	1	0.6	0.667	0.909	0.7428	10960.8
ALB	25	47	0.636	0.857	0.6	0.812	0.769	0.7348	6652.47
ALB	25	48	0.538	0.909	0.588	0.687	0.733	0.691	10450.9
ALB	25	49	0.444	0.917	0.6	0.5	0.75	0.6422	5322.72
ALB	25	50	0.538	0.818	0.529	0.7	0.615	0.64	15446.5
ALB	26	27	0.4	0.429	0.429	0.333	0.4	0.3982	3293.34
ALB	26	28	0.364	0.583	0.562	0.467	0.786	0.5524	12898.5
ALB	26	29	0.533	0.545	0.579	0.687	0.812	0.6312	7113.68
ALB	26	30	0.545	0.778	0.5	0.5	0.643	0.5932	7014.73
ALB	26	31	0.462	0.667	0.625	0.722	0.85	0.6652	14022.8
ALB	26	32	0.2	0.4	0.588	0.765	0.6	0.5106	5369.93
ALB	26	33	0.5	0.545	0.588	0.75	0.733	0.6232	4852.02
ALB	26	34	0.538	0.923	0.647	0.824	0.765	0.7394	5178.23
ALB	26	35	0.636	0.5	0.462	0.5	0.667	0.553	3571.46
ALB	26	36	0.545	0.25	0.4	0.417	0.538	0.43	16452.5
ALB	26	37	0.182	0.5	0.588	0.308	0.529	0.4214	2821.44
ALB	26	38	0.417	0.714	0.692	0.5	0.5	0.5646	3870.72
ALB	26	39	0.3	0.286	0.467	0.667	0.6	0.464	15646
ALB	26	40	0.545	0.4	0.643	0.222	0.545	0.471	11247.3
ALB	26	41	0.273	0.583	0.467	0.5	0.533	0.4712	6415.12
ALB	26	42	0.273	0.545	0.6	0.385	0.769	0.5144	2608.64
ALB	26	43	0.462	0.455	0.588	0.417	0.733	0.531	6152.41
ALB	26	44	0.3	0.5	0.529	0.25	0.733	0.4624	16312.2
ALB	26	45	0.333	0.429	0.5	0.4	0.769	0.4862	5627.45
ALB	26	46	0.5	0.5	0.562	0.364	0.769	0.539	6791.35
ALB	26	47	0.455	0.462	0.647	0.687	0.667	0.5836	2243.1
ALB	26	48	0.385	0.545	0.632	0.562	0.647	0.5542	4118.31
ALB	26	49	0.222	0.455	0.467	0.357	0.667	0.4336	4198.87
ALB	26	50	0.6	0.455	0.5	0.6	0.625	0.556	13891.8
ALB	27	28	0.545	0.727	0.357	0.529	0.7	0.5716	16183
ALB	27	29	0.571	0.818	0.5	0.647	0.846	0.6764	8912.7
ALB	27	30	0.727	0.857	0.4	0.571	0.5	0.611	8217.18
ALB	27	31	0.615	0.818	0.625	0.684	0.882	0.7248	16249.6
ALB	27	32	0.4	0.7	0.5	0.722	0.692	0.6028	8075.27
ALB	27	33	0.538	0.7	0.4	0.778	0.75	0.6332	1562.05
ALB	27	34	0.583	1	0.562	0.706	0.786	0.7274	1886.8
ALB	27	35	0.556	0.5	0.462	0.556	0.667	0.5482	6689.47
ALB	27	36	0.444	0.429	0.5	0.385	0.636	0.4788	18740.4
ALB	27	37	0.364	0.5	0.4	0.5	0.6	0.4728	2757.97
ALB	27	38	0.455	0.8	0.583	0.455	0.444	0.5474	2874.33
ALB	27	39	0.333	0.714	0.467	0.714	0.583	0.5622	17832.4
ALB	27	40	0.444	0.556	0.417	0.364	0.286	0.4134	14404.5
ALB	27	41	0.455	0.727	0.357	0.562	0.615	0.5432	6551.02
ALB	27	42	0.455	0.7	0.6	0.467	0.667	0.5778	1667.6
ALB	27	43	0.615	0.727	0.4	0.6	0.636	0.5956	7491.47
ALB	27	44	0.5	0.667	0.437	0.467	0.75	0.5642	18677.5
ALB	27	45	0.5	0.4	0.364	0.5	0.667	0.4862	2337.54
ALB	27	46	0.538	0.714	0.467	0.571	0.667	0.5914	8659.11
ALB	27	47	0.5	0.692	0.647	0.722	0.667	0.6456	5250.29
ALB	27	48	0.538	0.818	0.471	0.611	0.538	0.5952	1314.61
ALB	27	49	0.444	0.727	0.562	0.529	0.667	0.5858	5021.43
ALB	27	50	0.417	0.6	0.5	0.571	0.615	0.5406	16309.5
ALB	28	29	0.429	0.538	0.25	0.471	0.545	0.4466	12675.2
ALB	28	30	0.667	0.6	0.333	0.357	0.857	0.5628	14179.5
ALB	28	31	0.462	0.417	0.467	0.526	0.667	0.5078	12870.7
ALB	28	32	0.364	0.273	0.437	0.471	0.615	0.432	10169.7
ALB	28	33	0.5	0.273	0.437	0.529	0.667	0.4812	17744.9
ALB	28	34	0.273	0.786	0.5	0.529	0.615	0.5406	18057.3
ALB	28	35	0.75	0.636	0.6	0.474	0.692	0.6304	9657.71
ALB	28	36	0.769	0.455	0.437	0.5	0.545	0.5412	13847.1
ALB	28	37	0.462	0.5	0.437	0.312	0.625	0.4672	14926.8
ALB	28	38	0.643	0.909	0.5	0.571	0.636	0.6518	15995.5
ALB	28	39	0.583	0.636	0.5	0.6	0.8	0.6238	13933.2
ALB	28	40	0.667	0.273	0.462	0.5	0.7	0.5204	3380.95
ALB	28	41	0.417	0.182	0.4	0.375	0.733	0.4214	16007.2
ALB	28	42	0.538	0.273	0.533	0.267	0.917	0.5056	15296.5
ALB	28	43	0.571	0.462	0.437	0.4	0.769	0.5278	13712.6
ALB	28	44	0.583	0.5	0.556	0.471	0.769	0.5758	13318.2
ALB	28	45	0.462	0.6	0.417	0.5	0.556	0.507	18501.6
ALB	28	46	0.5	0.5	0.4	0.357	0.818	0.515	12463.3
ALB	28	47	0.583	0.562	0.5	0.471	0.455	0.5142	11343.8
ALB	28	48	0.5	0.417	0.312	0.444	0.571	0.4488	16956.4
ALB	28	49	0.222	0.333	0.5	0.353	0.6	0.4016	13708.2
ALB	28	50	0.6	0.462	0.353	0.35	0.643	0.4816	11757.4
ALB	29	30	0.571	0.7	0.474	0.6	0.714	0.6118	1635.27
ALB	29	31	0.4	0.364	0.5	0.375	0.625	0.4528	7396.5
ALB	29	32	0.429	0.364	0.474	0.5	0.571	0.4676	3073.14
ALB	29	33	0.437	0.5	0.389	0.467	0.5	0.4586	9949.88
ALB	29	34	0.357	0.667	0.444	0.467	0.571	0.5012	10348.3
ALB	29	35	0.733	0.727	0.611	0.65	0.812	0.7066	8147.17
ALB	29	36	0.667	0.545	0.474	0.533	0.714	0.5866	9898.09
ALB	29	37	0.5	0.6	0.55	0.611	0.667	0.5856	6186.52
ALB	29	38	0.562	0.9	0.625	0.615	0.786	0.6976	6580.12
ALB	29	39	0.6	0.6	0.526	0.643	0.667	0.6072	8946.84
ALB	29	40	0.667	0.5	0.588	0.643	0.75	0.6296	12903.5
ALB	29	41	0.467	0.538	0.526	0.5	0.6	0.5262	4120.94
ALB	29	42	0.467	0.5	0.632	0.5	0.929	0.6056	7250.41
ALB	29	43	0.5	0.417	0.474	0.706	0.8	0.5794	1685.85
ALB	29	44	0.6	0.692	0.571	0.667	0.8	0.666	9891.82
ALB	29	45	0.4	0.7	0.562	0.733	0.75	0.629	10731.6
ALB	29	46	0.333	0.444	0.444	0.5	0.75	0.4942	352.278
ALB	29	47	0.5	0.429	0.353	0.4	0.538	0.444	5283.85
ALB	29	48	0.437	0.5	0.278	0.556	0.625	0.4792	8619.54
ALB	29	49	0.462	0.417	0.526	0.632	0.722	0.5518	11212.4
ALB	29	50	0.611	0.273	0.222	0.524	0.6	0.446	7624.5
ALB	30	31	0.714	0.7	0.588	0.647	0.706	0.671	8537.57
ALB	30	32	0.667	0.7	0.556	0.5	0.667	0.618	4218.07
ALB	30	33	0.733	0.7	0.556	0.571	0.615	0.635	9056.83
ALB	30	34	0.786	0.778	0.611	0.571	0.667	0.6826	9446.38
ALB	30	35	0.7	0.714	0.706	0.5	0.812	0.6864	8737.1
ALB	30	36	0.727	0.625	0.471	0.417	0.8	0.608	11019.8
ALB	30	37	0.615	0.5	0.556	0.533	0.588	0.5584	5463.74
ALB	30	38	0.583	0.8	0.643	0.5	0.692	0.6436	5603.51
ALB	30	39	0.636	0.875	0.529	0.545	0.462	0.6094	10003.1
ALB	30	40	0.833	0.556	0.5	0.545	0.5	0.5868	14200.9
ALB	30	41	0.692	0.6	0.214	0.385	0.6	0.4982	2597.73
ALB	30	42	0.455	0.556	0.357	0.385	0.5	0.4506	6560.26
ALB	30	43	0.615	0.727	0.471	0.417	0.615	0.569	874.185
ALB	30	44	0.636	0.667	0.65	0.6	0.8	0.6706	11078.8
ALB	30	45	0.615	0.857	0.462	0.667	0.75	0.6702	9794.09
ALB	30	46	0.643	0.5	0.529	0.5	0.5	0.5344	1749.29
ALB	30	47	0.636	0.786	0.611	0.6	0.643	0.6552	5587.17
ALB	30	48	0.733	0.556	0.526	0.562	0.429	0.5612	7710.65
ALB	30	49	0.6	0.6	0.529	0.647	0.722	0.6196	11211
ALB	30	50	0.733	0.727	0.474	0.526	0.6	0.612	8925.43
ALB	31	32	0.462	0.364	0.4	0.556	0.5	0.4564	8746.43
ALB	31	33	0.231	0.364	0.5	0.333	0.533	0.3922	17341.6
ALB	31	34	0.385	0.545	0.467	0.333	0.5	0.446	17740.6
ALB	31	35	0.692	0.727	0.75	0.682	0.85	0.7402	13745.1
ALB	31	36	0.714	0.545	0.667	0.588	0.778	0.6584	2501.62
ALB	31	37	0.533	0.6	0.667	0.579	0.667	0.6092	13560.5
ALB	31	38	0.687	0.9	0.583	0.75	0.833	0.7506	13972.6
ALB	31	39	0.538	0.727	0.647	0.687	0.588	0.6374	1629.13
ALB	31	40	0.5	0.5	0.538	0.687	0.882	0.6214	14848.6
ALB	31	41	0.385	0.417	0.562	0.556	0.611	0.5062	11071.5
ALB	31	42	0.6	0.5	0.6	0.632	0.812	0.6288	14602.8
ALB	31	43	0.625	0.538	0.588	0.667	0.842	0.652	9002.01
ALB	31	44	0.643	0.692	0.684	0.7	0.778	0.6994	2549.51
ALB	31	45	0.533	0.7	0.5	0.687	0.733	0.6306	18127.1
ALB	31	46	0.467	0.6	0.467	0.562	0.733	0.5658	7613.68
ALB	31	47	0.417	0.429	0.467	0.471	0.467	0.4502	11864.7
ALB	31	48	0.357	0.5	0.375	0.6	0.632	0.4928	16014.7
ALB	31	49	0.5	0.538	0.562	0.6	0.773	0.5946	17754.3
ALB	31	50	0.722	0.273	0.5	0.429	0.684	0.5216	1233.21
ALB	32	33	0.385	0.2	0.471	0.357	0.462	0.375	9436.63
ALB	32	34	0.538	0.769	0.437	0.562	0.429	0.547	9827
ALB	32	35	0.636	0.6	0.706	0.579	0.765	0.6572	5322.88
ALB	32	36	0.545	0.4	0.632	0.533	0.75	0.572	11128.9
ALB	32	37	0.182	0.444	0.632	0.611	0.556	0.485	5765.45
ALB	32	38	0.417	0.9	0.643	0.615	0.733	0.6616	6605.89
ALB	32	39	0.3	0.444	0.611	0.538	0.625	0.5036	10375.6
ALB	32	40	0.4	0.364	0.6	0.733	0.786	0.5766	9984.99
ALB	32	41	0.1	0.273	0.529	0.588	0.647	0.4274	5840.07
ALB	32	42	0.273	0.364	0.722	0.588	0.786	0.5466	6589.76
ALB	32	43	0.333	0.273	0.556	0.706	0.75	0.5236	3604.18
ALB	32	44	0.3	0.583	0.714	0.737	0.75	0.6168	10963.6
ALB	32	45	0.182	0.556	0.667	0.733	0.867	0.601	10263.3
ALB	32	46	0.385	0.444	0.437	0.687	0.786	0.5478	2747.74
ALB	32	47	0.3	0.429	0.529	0.4	0.385	0.4086	3148.49
ALB	32	48	0.25	0.364	0.353	0.556	0.588	0.4222	8249.86
ALB	32	49	0.222	0.273	0.611	0.632	0.75	0.4976	9016.7
ALB	32	50	0.6	0.417	0.55	0.45	0.647	0.5328	8537.26
ALB	33	34	0.533	0.769	0.333	0.533	0.333	0.5002	400
ALB	33	35	0.615	0.6	0.625	0.7	0.812	0.6704	8236.08
ALB	33	36	0.643	0.4	0.556	0.6	0.714	0.5826	19842
ALB	33	37	0.467	0.444	0.556	0.588	0.588	0.5286	3800.84
ALB	33	38	0.625	0.9	0.733	0.692	0.583	0.7066	3457.43
ALB	33	39	0.462	0.6	0.684	0.615	0.462	0.5646	18896.3
ALB	33	40	0.417	0.364	0.6	0.714	0.75	0.569	15945.2
ALB	33	41	0.308	0.1	0.529	0.562	0.6	0.4198	7053.87
ALB	33	42	0.533	0.2	0.647	0.647	0.846	0.5746	2849.72
ALB	33	43	0.562	0.273	0.556	0.687	0.875	0.5906	8415.59
ALB	33	44	0.571	0.583	0.579	0.722	0.941	0.6792	19812.4
ALB	33	45	0.467	0.556	0.462	0.714	0.75	0.5898	827.103
ALB	33	46	0.4	0.444	0.529	0.667	0.636	0.5352	9728.52
ALB	33	47	0.333	0.533	0.529	0.467	0.417	0.4558	6741.36
ALB	33	48	0.286	0.5	0.353	0.529	0.625	0.4586	1346.18
ALB	33	49	0.538	0.417	0.529	0.611	0.722	0.5634	6116.11
ALB	33	50	0.667	0.417	0.389	0.5	0.765	0.5476	17480
ALB	34	35	0.769	0.8	0.687	0.762	0.833	0.7702	8513.58
ALB	34	36	0.786	0.833	0.529	0.687	0.667	0.7004	20241.1
ALB	34	37	0.6	0.8	0.684	0.667	0.632	0.6766	4200.76
ALB	34	38	0.75	0.875	0.714	0.786	0.643	0.7536	3844.19
ALB	34	39	0.615	0.909	0.667	0.714	0.625	0.706	19294.5
ALB	34	40	0.692	0.857	0.571	0.8	0.786	0.7412	16211.4
ALB	34	41	0.571	0.786	0.588	0.562	0.647	0.6308	7417.51
ALB	34	42	0.667	0.857	0.706	0.647	0.692	0.7138	3243.59
ALB	34	43	0.687	0.867	0.529	0.765	0.824	0.7344	8810.34
ALB	34	44	0.714	0.846	0.632	0.85	0.889	0.7862	20212.1
ALB	34	45	0.6	1	0.538	0.8	0.786	0.7448	451.774
ALB	34	46	0.533	0.8	0.5	0.667	0.692	0.6384	10127.8
ALB	34	47	0.615	0.667	0.5	0.562	0.5	0.5688	7107.09
ALB	34	48	0.533	0.857	0.5	0.611	0.588	0.6178	1737.87
ALB	34	49	0.455	0.867	0.667	0.684	0.684	0.6714	6199.26
ALB	34	50	0.625	0.692	0.526	0.5	0.722	0.613	17880
ALB	35	36	0.556	0.286	0.533	0.437	0.538	0.47	15966.8
ALB	35	37	0.583	0.333	0.533	0.444	0.611	0.5008	6219.21
ALB	35	38	0.667	0.6	0.75	0.6	0.5	0.6234	7323.93
ALB	35	39	0.444	0.571	0.6	0.625	0.687	0.5854	15353.9
ALB	35	40	0.556	0.444	0.583	0.625	0.667	0.575	7717.06
ALB	35	41	0.545	0.636	0.687	0.412	0.625	0.581	9075.55
ALB	35	42	0.545	0.6	0.643	0.5	0.857	0.629	6176.25
ALB	35	43	0.692	0.636	0.533	0.333	0.733	0.5854	7892.56
ALB	35	44	0.6	0.375	0.357	0.412	0.882	0.5252	15705.1
ALB	35	45	0.692	0.714	0.545	0.706	0.667	0.6648	8945.71
ALB	35	46	0.714	0.571	0.687	0.667	0.857	0.6992	7795.31
ALB	35	47	0.6	0.615	0.6	0.5	0.75	0.613	3268.79
ALB	35	48	0.615	0.727	0.667	0.474	0.722	0.641	7660.65
ALB	35	49	0.7	0.636	0.6	0.474	0.667	0.6154	4530.01
ALB	35	50	0.714	0.5	0.529	0.3	0.625	0.5336	13304.8
ALB	36	37	0.5	0.286	0.556	0.562	0.5	0.4808	16058.5
ALB	36	38	0.3	0.714	0.733	0.4	0.3	0.4894	16473.9
ALB	36	39	0.333	0.5	0.611	0.583	0.571	0.5196	1121.01
ALB	36	40	0.444	0.222	0.687	0.455	0.636	0.4888	16220.8
ALB	36	41	0.583	0.455	0.529	0.533	0.5	0.52	13532.1
ALB	36	42	0.3	0.4	0.647	0.533	0.846	0.5452	17097.1
ALB	36	43	0.5	0.455	0.556	0.571	0.714	0.5592	11500.4
ALB	36	44	0.5	0.333	0.579	0.429	0.8	0.5282	590
ALB	36	45	0.5	0.429	0.571	0.583	0.333	0.4832	20628.3
ALB	36	46	0.733	0.286	0.611	0.538	0.636	0.5608	10113.6
ALB	36	47	0.5	0.462	0.684	0.625	0.733	0.6008	14268.6
ALB	36	48	0.643	0.545	0.6	0.588	0.706	0.6164	18516
ALB	36	49	0.727	0.455	0.333	0.588	0.562	0.533	20096.6
ALB	36	50	0.538	0.3	0.474	0.474	0.5	0.4572	2664.3
ALB	37	38	0.25	0.833	0.643	0.643	0.467	0.5672	1114
ALB	37	39	0.273	0.571	0.529	0.667	0.471	0.5022	15128
ALB	37	40	0.5	0.444	0.6	0.462	0.6	0.5212	13673.9
ALB	37	41	0.25	0.5	0.437	0.437	0.412	0.4072	4026.5
ALB	37	42	0.25	0.444	0.467	0.333	0.765	0.4518	1096.59
ALB	37	43	0.308	0.5	0.471	0.467	0.588	0.4668	4734.02
ALB	37	44	0.273	0.556	0.579	0.437	0.667	0.5024	16019
ALB	37	45	0.167	0.5	0.571	0.462	0.6	0.46	4609.13
ALB	37	46	0.467	0.333	0.437	0.429	0.6	0.4532	5948.99
ALB	37	47	0.417	0.615	0.611	0.529	0.529	0.5402	3584.45
ALB	37	48	0.357	0.6	0.444	0.412	0.353	0.4332	2520.36
ALB	37	49	0.364	0.5	0.529	0.312	0.55	0.451	6533.15
ALB	37	50	0.562	0.5	0.55	0.476	0.5	0.5176	13680.1
ALB	38	39	0.364	0.833	0.615	0.556	0.538	0.5812	15504.2
ALB	38	40	0.455	0.778	0.444	0.375	0.444	0.4992	14784.9
ALB	38	41	0.462	0.909	0.615	0.5	0.462	0.5896	3691.77
ALB	38	42	0.182	0.9	0.667	0.5	0.833	0.6164	1553.22
ALB	38	43	0.25	0.909	0.643	0.545	0.786	0.6266	4991.24
ALB	38	44	0.364	0.75	0.667	0.615	0.867	0.6526	16471.6
ALB	38	45	0.25	1	0.556	0.556	0.444	0.5612	4192.29
ALB	38	46	0.625	0.833	0.5	0.636	0.6	0.6388	6388.53
ALB	38	47	0.5	0.846	0.615	0.615	0.714	0.658	4667
ALB	38	48	0.533	0.9	0.6	0.571	0.687	0.6582	2113.01
ALB	38	49	0.583	0.909	0.714	0.667	0.625	0.6996	7305.14
ALB	38	50	0.533	0.8	0.625	0.684	0.571	0.6426	14181.9
ALB	39	40	0.333	0.6	0.571	0.6	0.692	0.5592	16120.4
ALB	39	41	0.364	0.636	0.4	0.643	0.357	0.48	12488.7
ALB	39	42	0.2	0.6	0.533	0.643	0.692	0.5336	16179.7
ALB	39	43	0.417	0.5	0.437	0.583	0.667	0.5208	10517.5
ALB	39	44	0.222	0.556	0.556	0.733	0.75	0.5634	1491
ALB	39	45	0.417	0.5	0.538	0.727	0.583	0.553	19674.5
ALB	39	46	0.571	0.571	0.5	0.667	0.583	0.5784	9179.63
ALB	39	47	0.222	0.615	0.588	0.643	0.6	0.5336	13492.5
ALB	39	48	0.462	0.6	0.5	0.687	0.588	0.5674	17563.5
ALB	39	49	0.5	0.5	0.588	0.687	0.684	0.5918	19382.7
ALB	39	50	0.571	0.636	0.526	0.632	0.467	0.5664	2264.91
ALB	40	41	0.3	0.273	0.462	0.538	0.5	0.4146	15568.6
ALB	40	42	0.455	0.2	0.5	0.417	0.8	0.4744	13814.9
ALB	40	43	0.5	0.417	0.385	0.455	0.636	0.4786	13569.5
ALB	40	44	0.5	0.3	0.533	0.417	0.75	0.5	15741
ALB	40	45	0.5	0.556	0.333	0.25	0.667	0.4612	16636.5
ALB	40	46	0.643	0.444	0.462	0.4	0.5	0.4898	12624.7
ALB	40	47	0.333	0.533	0.462	0.733	0.667	0.5456	10182
ALB	40	48	0.417	0.364	0.562	0.687	0.538	0.5136	15362
ALB	40	49	0.6	0.273	0.667	0.5	0.667	0.5414	11157.8
ALB	40	50	0.643	0.273	0.5	0.7	0.615	0.5462	13865.1
ALB	41	42	0.333	0.1	0.308	0.286	0.875	0.3804	5035.37
ALB	41	43	0.385	0.333	0.333	0.308	0.687	0.4092	2515.59
ALB	41	44	0.364	0.5	0.632	0.588	0.6	0.5368	13619.8
ALB	41	45	0.25	0.6	0.417	0.643	0.615	0.505	7705.87
ALB	41	46	0.429	0.5	0.4	0.5	0.615	0.4888	4113.98
ALB	41	47	0.364	0.562	0.588	0.4	0.533	0.4894	5821.24
ALB	41	48	0.167	0.417	0.412	0.267	0.611	0.3748	5743.76
ALB	41	49	0.3	0.333	0.5	0.471	0.632	0.4472	10472.1
ALB	41	50	0.625	0.462	0.526	0.368	0.4	0.4762	11508.8
ALB	42	43	0.25	0.273	0.467	0.429	0.636	0.411	5825.5
ALB	42	44	0.2	0.455	0.667	0.5	0.929	0.5502	17044.4
ALB	42	45	0.25	0.556	0.455	0.538	0.8	0.5198	3675.27
ALB	42	46	0.533	0.444	0.533	0.385	0.667	0.5124	7001.79
ALB	42	47	0.364	0.625	0.533	0.5	0.857	0.5758	4032.63
ALB	42	48	0.429	0.364	0.529	0.471	0.643	0.4872	1710.47
ALB	42	49	0.455	0.273	0.533	0.471	0.824	0.5112	5753.13
ALB	42	50	0.533	0.417	0.556	0.524	0.8	0.566	14688.9
ALB	43	44	0.417	0.615	0.5	0.429	0.714	0.535	11520.7
ALB	43	45	0.167	0.6	0.462	0.583	0.75	0.5124	9176.19
ALB	43	46	0.562	0.5	0.437	0.538	0.636	0.5346	1616.23
ALB	43	47	0.417	0.467	0.529	0.625	0.733	0.5542	4720.78
ALB	43	48	0.467	0.417	0.353	0.5	0.533	0.454	7072.94
ALB	43	49	0.5	0.333	0.611	0.5	0.722	0.5332	10345.8
ALB	43	50	0.562	0.462	0.474	0.474	0.6	0.5144	9287.65
ALB	44	45	0.417	0.667	0.5	0.538	0.846	0.5936	20605.8
ALB	44	46	0.571	0.556	0.632	0.5	0.846	0.621	10090.5
ALB	44	47	0.4	0.5	0.632	0.667	0.733	0.5864	14110.7
ALB	44	48	0.462	0.455	0.619	0.632	0.706	0.5748	18494.1
ALB	44	49	0.5	0.364	0.632	0.375	0.722	0.5186	19889.6
ALB	44	50	0.667	0.5	0.5	0.524	0.6	0.5582	2429.16
ALB	45	46	0.467	0.5	0.538	0.545	0.5	0.51	10517.2
ALB	45	47	0.417	0.692	0.643	0.733	0.769	0.6508	7557.57
ALB	45	48	0.357	0.7	0.533	0.687	0.733	0.602	2112.37
ALB	45	49	0.364	0.6	0.538	0.5	0.667	0.5338	6507.48
ALB	45	50	0.562	0.6	0.562	0.7	0.615	0.6078	18281.4
ALB	46	47	0.462	0.615	0.5	0.6	0.769	0.5892	4938.59
ALB	46	48	0.286	0.6	0.312	0.647	0.643	0.4976	8405
ALB	46	49	0.417	0.5	0.5	0.467	0.75	0.5268	10876.6
ALB	46	50	0.667	0.5	0.526	0.6	0.714	0.6014	7794.7
ALB	47	48	0.462	0.533	0.412	0.375	0.467	0.4498	5738.71
ALB	47	49	0.5	0.467	0.667	0.471	0.667	0.5544	5988.46
ALB	47	50	0.667	0.357	0.25	0.368	0.706	0.4696	11685.2
ALB	48	49	0.417	0.1	0.5	0.444	0.579	0.408	6334.18
ALB	48	50	0.667	0.538	0.368	0.35	0.611	0.5068	16173.4
ALB	49	50	0.643	0.462	0.444	0.35	0.632	0.5062	17463.1
HAI	1	2	0.333	0.474	0.55	0.467	0.5	0.4648	4244.87
HAI	1	3	0.316	0.687	0.571	0.611	0.421	0.5212	9644
HAI	1	4	0.619	0.687	0.667	0.778	0.591	0.6684	25178
HAI	1	5	0.7	0.667	0.667	0.611	0.471	0.6232	10473.9
HAI	1	6	0.696	0.615	0.667	0.625	0.588	0.6382	10892.1
HAI	1	7	0.609	0.4	0.647	0.706	0.5	0.5724	7427.64
HAI	1	8	0.571	0.588	0.722	0.722	0.6	0.6406	23276.1
HAI	1	9	0.476	0.5	0.647	0.762	0.632	0.6034	7335.5
HAI	1	10	0.52	0.75	0.778	0.867	0.565	0.696	14388.2
HAI	1	11	0.579	0.733	0.684	0.824	0.55	0.674	10655
HAI	1	12	0.476	0.687	0.75	0.714	0.556	0.6366	13173.6
HAI	1	13	0.619	0.765	0.524	0.579	0.556	0.6086	6418.11
HAI	1	14	0.5	0.6	0.684	0.789	0.667	0.648	20631.5
HAI	1	15	0.5	0.733	0.737	0.75	0.727	0.6894	5143.74
HAI	1	16	0.55	0.643	0.562	0.687	0.571	0.6026	2936.41
HAI	1	17	0.667	0.571	0.737	0.667	0.632	0.6548	12776.9
HAI	1	18	0.65	0.692	0.933	0.833	0.611	0.7438	17121
HAI	1	19	0.333	0.687	0.687	0.643	0.6	0.59	1831.91
HAI	1	20	0.4	0.667	0.625	0.687	0.471	0.57	16728.6
HAI	1	21	0.4	0.667	0.75	0.722	0.529	0.6136	1044.03
HAI	1	22	0.45	0.615	0.687	0.75	0.471	0.5946	17073
HAI	1	23	0.524	0.467	0.773	0.737	0.471	0.5944	13096.2
HAI	1	24	0.56	0.571	0.65	0.7	0.667	0.6296	19402.3
HAI	1	25	0.619	0.467	0.737	0.75	0.526	0.6198	13051.1
HAI	1	26	0.5	0.5	0.611	0.684	0.696	0.5982	22084.4
HAI	1	27	0.526	0.6	0.684	0.667	0.632	0.6218	23480.4
HAI	1	28	0.4	0.6	0.562	0.687	0.45	0.5398	23961.6
HAI	1	29	0.476	0.417	0.611	0.737	0.571	0.5624	7534.63
HAI	1	30	0.565	0.417	0.789	0.778	0.611	0.632	6826.86
HAI	1	31	0.545	0.588	0.8	0.733	0.526	0.6384	6092.01
HAI	1	32	0.591	0.5	0.684	0.812	0.562	0.6298	5655.7
HAI	1	33	0.565	0.462	0.632	0.529	0.727	0.583	21663.3
HAI	1	34	0.609	0.687	0.773	0.647	0.579	0.659	14458.9
HAI	1	35	0.5	0.687	0.667	0.643	0.556	0.6106	10633
HAI	1	36	0.619	0.722	0.667	0.812	0.632	0.6904	10648.2
HAI	1	37	0.522	0.611	0.684	0.812	0.762	0.6782	14677
HAI	1	38	0.609	0.706	0.684	0.778	0.65	0.6854	15181.9
HAI	1	39	0.583	0.684	0.611	0.722	0.571	0.6342	14312.2
HAI	1	40	0.4	0.7	0.667	0.737	0.524	0.6056	16942.3
HAI	1	41	0.571	0.556	0.588	0.765	0.682	0.6324	12587.3
HAI	1	42	0.429	0.733	0.687	0.75	0.5	0.6198	13242.1
HAI	1	43	0.65	0.75	0.75	0.773	0.579	0.7004	16504.1
HAI	1	44	0.571	0.687	0.722	0.687	0.619	0.6572	16792.4
HAI	1	45	0.55	0.571	0.933	0.588	0.667	0.6618	20347.3
HAI	1	46	0.579	0.687	0.611	0.778	0.526	0.6362	18610.2
HAI	1	47	0.619	0.562	0.632	0.778	0.5	0.6182	3893.08
HAI	1	48	0.5	0.647	0.579	0.706	0.619	0.6102	7304.89
HAI	1	49	0.45	0.429	0.667	0.692	0.474	0.5424	6300.86
HAI	1	50	0.476	0.625	0.778	0.762	0.632	0.6546	13826.3
HAI	2	3	0.294	0.632	0.45	0.7	0.437	0.5026	8008.93
HAI	2	4	0.556	0.7	0.684	0.722	0.7	0.6724	21089.9
HAI	2	5	0.789	0.833	0.611	0.7	0.6	0.7066	10822.1
HAI	2	6	0.579	0.722	0.611	0.562	0.643	0.6234	11154.3
HAI	2	7	0.739	0.619	0.737	0.722	0.706	0.7046	8847.88
HAI	2	8	0.579	0.619	0.737	0.737	0.722	0.6788	19192.7
HAI	2	9	0.55	0.7	0.737	0.714	0.765	0.6932	8910.36
HAI	2	10	0.583	0.75	0.722	0.8	0.783	0.7276	14840.4
HAI	2	11	0.667	0.8	0.7	0.765	0.737	0.7338	12119.9
HAI	2	12	0.619	0.762	0.762	0.812	0.687	0.7284	13547.5
HAI	2	13	0.556	0.556	0.4	0.6	0.5	0.5224	5389.66
HAI	2	14	0.5	0.632	0.7	0.8	0.647	0.6558	19046.3
HAI	2	15	0.5	0.8	0.684	0.765	0.722	0.6942	1515.39
HAI	2	16	0.556	0.8	0.667	0.778	0.75	0.7102	3004.13
HAI	2	17	0.682	0.611	0.75	0.75	0.6	0.6786	12861.9
HAI	2	18	0.667	0.778	0.937	0.706	0.75	0.7676	14130
HAI	2	19	0.4	0.556	0.778	0.667	0.789	0.638	2552.26
HAI	2	20	0.474	0.765	0.789	0.706	0.6	0.6668	13805
HAI	2	21	0.55	0.75	0.765	0.667	0.571	0.6606	3968.49
HAI	2	22	0.6	0.789	0.778	0.7	0.6	0.6934	14166.5
HAI	2	23	0.6	0.667	0.727	0.81	0.687	0.6982	13595.3
HAI	2	24	0.565	0.611	0.667	0.773	0.85	0.6932	20076.5
HAI	2	25	0.632	0.6	0.684	0.7	0.722	0.6676	13143.9
HAI	2	26	0.571	0.762	0.7	0.7	0.75	0.6966	17974
HAI	2	27	0.529	0.632	0.7	0.75	0.687	0.6596	19384.8
HAI	2	28	0.55	0.7	0.8	0.842	0.7	0.7184	19858.5
HAI	2	29	0.55	0.737	0.7	0.684	0.81	0.6962	9201.42
HAI	2	30	0.636	0.667	0.667	0.722	0.75	0.6884	8403.6
HAI	2	31	0.55	0.619	0.75	0.75	0.722	0.6782	7557.02
HAI	2	32	0.526	0.762	0.7	0.824	0.714	0.7052	7882.78
HAI	2	33	0.636	0.75	0.65	0.632	0.722	0.678	17556.3
HAI	2	34	0.739	0.7	0.727	0.667	0.778	0.7222	15139.4
HAI	2	35	0.636	0.7	0.682	0.667	0.765	0.69	11973.8
HAI	2	36	0.632	0.783	0.81	0.75	0.765	0.748	11866.3
HAI	2	37	0.591	0.696	0.7	0.75	0.833	0.714	15289.1
HAI	2	38	0.682	0.65	0.632	0.722	0.778	0.6928	15849.6
HAI	2	39	0.652	0.696	0.7	0.667	0.684	0.6798	14652.3
HAI	2	40	0.474	0.652	0.75	0.611	0.7	0.6374	17031.9
HAI	2	41	0.579	0.652	0.81	0.706	0.8	0.7094	12808.2
HAI	2	42	0.571	0.8	0.842	0.765	0.706	0.7368	13489.8
HAI	2	43	0.667	0.75	0.833	0.727	0.706	0.7366	13610.3
HAI	2	44	0.65	0.7	0.909	0.778	0.737	0.7548	13761.1
HAI	2	45	0.556	0.684	0.937	0.75	0.538	0.693	18738.5
HAI	2	46	0.667	0.632	0.632	0.722	0.722	0.675	19471.7
HAI	2	47	0.632	0.727	0.714	0.722	0.684	0.6958	3507.28
HAI	2	48	0.571	0.727	0.526	0.647	0.737	0.6416	8325.78
HAI	2	49	0.444	0.714	0.611	0.714	0.737	0.644	7454.43
HAI	2	50	0.619	0.714	0.722	0.773	0.765	0.7186	14346.9
HAI	3	4	0.562	0.941	0.762	0.529	0.682	0.6952	18956.9
HAI	3	5	0.667	0.818	0.471	0.444	0.588	0.5976	4947.18
HAI	3	6	0.588	0.75	0.632	0.333	0.625	0.5856	5000.25
HAI	3	7	0.7	0.765	0.684	0.611	0.529	0.6578	16488.6
HAI	3	8	0.5	0.6	0.684	0.471	0.632	0.5774	17160.4
HAI	3	9	0.556	0.8	0.684	0.474	0.667	0.6362	16486.2
HAI	3	10	0.591	0.625	0.667	0.75	0.591	0.6448	22828.1
HAI	3	11	0.5	0.933	0.65	0.722	0.65	0.691	19812.6
HAI	3	12	0.471	0.8	0.714	0.765	0.667	0.6834	21537.9
HAI	3	13	0.467	0.364	0.5	0.421	0.5	0.4504	3230.99
HAI	3	14	0.588	0.875	0.714	0.556	0.7	0.6866	11138.1
HAI	3	15	0.5	0.933	0.632	0.562	0.7	0.6654	9254.47
HAI	3	16	0.562	0.933	0.684	0.5	0.667	0.6692	10562.4
HAI	3	17	0.7	0.867	0.762	0.5	0.667	0.6992	5981.37
HAI	3	18	0.6	0.923	0.875	0.667	0.647	0.7424	8209.31
HAI	3	19	0.474	0.8	0.85	0.625	0.556	0.661	8275.7
HAI	3	20	0.375	0.818	0.737	0.5	0.5	0.586	7743.04
HAI	3	21	0.471	0.867	0.778	0.556	0.562	0.6468	8628.37
HAI	3	22	0.529	0.846	0.647	0.526	0.4	0.5896	8036.58
HAI	3	23	0.684	0.824	0.739	0.5	0.667	0.6828	7176.66
HAI	3	24	0.696	0.786	0.619	0.474	0.7	0.655	28054
HAI	3	25	0.647	0.824	0.632	0.444	0.632	0.6358	6223.89
HAI	3	26	0.579	0.8	0.773	0.444	0.667	0.6526	16261.8
HAI	3	27	0.533	0.714	0.5	0.412	0.667	0.5652	17431.6
HAI	3	28	0.556	0.714	0.75	0.588	0.619	0.6454	17929.4
HAI	3	29	0.556	0.769	0.579	0.65	0.667	0.6442	16743.4
HAI	3	30	0.65	0.769	0.75	0.529	0.647	0.669	15962
HAI	3	31	0.556	0.687	0.7	0.625	0.556	0.6248	15131.2
HAI	3	32	0.529	0.875	0.714	0.706	0.687	0.7022	15076.7
HAI	3	33	0.65	0.786	0.727	0.353	0.7	0.6432	15855.3
HAI	3	34	0.632	0.714	0.682	0.556	0.684	0.6536	23096.1
HAI	3	35	0.579	0.941	0.636	0.706	0.667	0.7058	19713.7
HAI	3	36	0.562	0.75	0.818	0.706	0.737	0.7146	19649.2
HAI	3	37	0.526	0.706	0.65	0.625	0.737	0.6488	23257.8
HAI	3	38	0.556	0.643	0.65	0.684	0.684	0.6434	23812.3
HAI	3	39	0.667	0.706	0.714	0.556	0.6	0.6486	22650
HAI	3	40	0.375	0.647	0.762	0.65	0.619	0.6106	25040.3
HAI	3	41	0.5	0.789	0.818	0.588	0.714	0.6818	20808.6
HAI	3	42	0.5	0.667	0.789	0.647	0.611	0.6428	21490.6
HAI	3	43	0.687	0.937	0.842	0.421	0.684	0.7142	7491.66
HAI	3	44	0.667	0.941	0.913	0.5	0.714	0.747	7974.87
HAI	3	45	0.562	0.786	1	0.579	0.533	0.692	10839.3
HAI	3	46	0.5	0.714	0.65	0.529	0.632	0.605	27414.9
HAI	3	47	0.562	0.75	0.727	0.611	0.6	0.65	11346.2
HAI	3	48	0.5	0.75	0.55	0.529	0.65	0.5958	16097.6
HAI	3	49	0.437	0.812	0.7	0.824	0.579	0.6704	15148
HAI	3	50	0.471	0.812	0.737	0.619	0.667	0.6612	22323.9
HAI	4	5	0.786	0.917	0.667	0.437	0.611	0.6836	23530.8
HAI	4	6	0.6	0.846	0.824	0.533	0.562	0.673	23415.9
HAI	4	7	0.722	0.833	0.812	0.533	0.556	0.6912	28464.4
HAI	4	8	0.6	0.765	0.812	0.083	0.714	0.5948	1902.34
HAI	4	9	0.647	0.875	0.733	0.471	0.611	0.6674	28662.6
HAI	4	10	0.727	0.842	0.875	0.455	0.667	0.7132	31490.6
HAI	4	11	0.615	0.857	0.833	0.571	0.6	0.6952	31078.9
HAI	4	12	0.647	0.875	0.833	0.714	0.684	0.7506	30402.1
HAI	4	13	0.824	0.941	0.773	0.579	0.75	0.7734	20867.1
HAI	4	14	0.5	0.364	0.6	0.231	0.579	0.4548	19170.1
HAI	4	15	0.579	0.667	0.667	0.462	0.5	0.575	20842.8
HAI	4	16	0.571	0.667	0.538	0.385	0.474	0.527	23812.9
HAI	4	17	0.562	0.583	0.75	0.4	0.611	0.5812	23438.3
HAI	4	18	0.5	0.6	0.8	0.385	0.588	0.5746	12242.9
HAI	4	19	0.556	0.714	0.786	0.643	0.773	0.6944	23348.7
HAI	4	20	0.722	0.818	0.875	0.25	0.611	0.6552	12691.3
HAI	4	21	0.562	0.867	0.769	0.357	0.667	0.6444	24570.8
HAI	4	22	0.429	0.846	0.692	0.333	0.611	0.5822	12648.9
HAI	4	23	0.533	0.667	0.562	0.286	0.529	0.5154	24822.6
HAI	4	24	0.65	0.583	0.722	0.556	0.65	0.6322	36057.3
HAI	4	25	0.462	0.462	0.571	0.333	0.5	0.4656	23545.6
HAI	4	26	0.588	0.875	0.765	0.437	0.739	0.6808	3135.89
HAI	4	27	0.643	0.8	0.765	0.5	0.529	0.6474	1708.16
HAI	4	28	0.562	0.8	0.643	0.5	0.571	0.6152	1260.87
HAI	4	29	0.722	0.857	0.765	0.667	0.739	0.75	28979.5
HAI	4	30	0.588	0.769	0.882	0.533	0.667	0.6878	28270.6
HAI	4	31	0.562	0.895	0.75	0.538	0.579	0.6648	27530.2
HAI	4	32	0.533	0.8	0.687	0.538	0.625	0.6366	28346.7
HAI	4	33	0.667	0.786	0.625	0.529	0.714	0.6642	3543.7
HAI	4	34	0.722	0.875	0.789	0.562	0.632	0.716	32163.5
HAI	4	35	0.588	0.8	0.8	0.538	0.611	0.6674	30794.8
HAI	4	36	0.571	0.889	0.75	0.643	0.75	0.7206	30540.8
HAI	4	37	0.684	0.842	0.833	0.538	0.684	0.7162	32144.1
HAI	4	38	0.722	0.882	0.687	0.533	0.632	0.6912	32683.4
HAI	4	39	0.75	0.9	0.765	0.647	0.739	0.7602	31127.5
HAI	4	40	0.562	0.789	0.824	0.667	0.696	0.7076	32309.1
HAI	4	41	0.687	0.789	0.824	0.5	0.727	0.7054	29599.1
HAI	4	42	0.667	0.857	0.786	0.75	0.632	0.7384	30119
HAI	4	43	0.615	0.583	0.4	0.412	0.556	0.5132	12903.5
HAI	4	44	0.5	0.615	0.538	0.25	0.444	0.4694	12188
HAI	4	45	0.571	0.692	0.8	0.588	0.647	0.6596	18971.1
HAI	4	46	0.615	0.8	0.765	0.625	0.5	0.661	35987.5
HAI	4	47	0.571	0.889	0.842	0.625	0.619	0.7092	23801.9
HAI	4	48	0.667	0.889	0.722	0.533	0.526	0.6674	27676.6
HAI	4	49	0.625	0.812	0.824	0.692	0.6	0.7106	27191
HAI	4	50	0.562	0.812	0.8	0.471	0.684	0.6658	31261
HAI	5	6	0.714	0.75	0.667	0.611	0.364	0.6212	441.475
HAI	5	7	0.571	0.667	0.643	0.529	0.385	0.559	17898.3
HAI	5	8	0.5	0.667	0.538	0.375	0.533	0.5226	21797.3
HAI	5	9	0.667	0.556	0.643	0.389	0.667	0.5844	17809.4
HAI	5	10	0.684	0.786	0.5	0.571	0.579	0.624	24785.6
HAI	5	11	0.5	0.778	0.6	0.789	0.562	0.6458	21122.1
HAI	5	12	0.571	0.7	0.6	0.6	0.571	0.6084	23540.7
HAI	5	13	0.867	0.818	0.65	0.333	0.667	0.667	5554.39
HAI	5	14	0.8	0.917	0.6	0.556	0.533	0.6812	11444.8
HAI	5	15	0.667	0.9	0.571	0.722	0.533	0.6786	12306.1
HAI	5	16	0.583	0.778	0.538	0.4	0.5	0.5598	12504.1
HAI	5	17	0.824	0.8	0.667	0.5	0.462	0.6506	2324.18
HAI	5	18	0.5	0.875	0.909	0.5	0.417	0.6402	11898
HAI	5	19	0.722	0.7	0.692	0.533	0.625	0.6544	9871.63
HAI	5	20	0.75	0.4	0.714	0.5	0.333	0.5394	11402.2
HAI	5	21	0.571	0.667	0.545	0.375	0.417	0.515	9471.53
HAI	5	22	0.643	0.571	0.692	0.444	0.333	0.5366	11601.5
HAI	5	23	0.733	0.75	0.647	0.5	0.333	0.5926	2774.06
HAI	5	24	0.667	0.8	0.562	0.55	0.625	0.6408	29860.8
HAI	5	25	0.786	0.75	0.333	0.353	0.429	0.5302	2589.56
HAI	5	26	0.6	0.556	0.687	0.25	0.5	0.5186	20982.1
HAI	5	27	0.769	0.556	0.25	0.412	0.462	0.4898	22079
HAI	5	28	0.462	0.556	0.643	0.4	0.333	0.4788	22570.9
HAI	5	29	0.571	0.429	0.5	0.5	0.5	0.5	18005.7
HAI	5	30	0.765	0.429	0.733	0.611	0.643	0.6362	17300.2
HAI	5	31	0.571	0.667	0.462	0.706	0.429	0.567	16553.1
HAI	5	32	0.538	0.7	0.5	0.706	0.455	0.5798	16095.7
HAI	5	33	0.687	0.667	0.533	0.353	0.533	0.5546	20586.6
HAI	5	34	0.667	0.7	0.467	0.556	0.6	0.598	24901.1
HAI	5	35	0.6	0.7	0.5	0.625	0.571	0.5992	21106.1
HAI	5	36	0.583	0.846	0.75	0.625	0.667	0.6942	21121.5
HAI	5	37	0.625	0.692	0.5	0.625	0.75	0.6384	25109.1
HAI	5	38	0.571	0.727	0.385	0.611	0.687	0.5962	25625.6
HAI	5	39	0.706	0.786	0.5	0.556	0.588	0.6272	24680.6
HAI	5	40	0.571	0.8	0.667	0.579	0.611	0.6456	27254.2
HAI	5	41	0.5	0.714	0.75	0.588	0.722	0.6548	22902.3
HAI	5	42	0.6	0.625	0.692	0.722	0.6	0.6478	23573.1
HAI	5	43	0.636	0.909	0.667	0.421	0.385	0.6036	11149.7
HAI	5	44	0.8	0.917	0.812	0.4	0.357	0.6572	11784.5
HAI	5	45	0.692	0.667	0.909	0.65	0.5	0.6836	11224.9
HAI	5	46	0.333	0.7	0.5	0.611	0.533	0.5354	29081.8
HAI	5	47	0.583	0.636	0.625	0.611	0.588	0.6086	13471.9
HAI	5	48	0.6	0.636	0.467	0.611	0.562	0.5752	17728.6
HAI	5	49	0.643	0.727	0.667	0.75	0.467	0.6508	16724.5
HAI	5	50	0.571	0.727	0.615	0.55	0.571	0.6068	24234.8
HAI	6	7	0.737	0.615	0.643	0.533	0.273	0.5602	18313.8
HAI	6	8	0.533	0.615	0.733	0.562	0.462	0.581	21697.5
HAI	6	9	0.588	0.636	0.812	0.471	0.5	0.6014	18227.4
HAI	6	10	0.619	0.733	0.714	0.692	0.529	0.6574	25188.6
HAI	6	11	0.643	0.818	0.6	0.667	0.385	0.6226	21543.4
HAI	6	12	0.588	0.5	0.833	0.615	0.364	0.58	23941.1
HAI	6	13	0.765	0.846	0.65	0.5	0.5	0.6522	5845.77
HAI	6	14	0.706	0.75	0.687	0.562	0.571	0.6552	11032.3
HAI	6	15	0.526	0.7	0.75	0.571	0.571	0.6236	12630.2
HAI	6	16	0.5	0.818	0.733	0.5	0.533	0.6168	12889.5
HAI	6	17	0.667	0.6	0.824	0.5	0.364	0.591	1891.8
HAI	6	18	0.538	0.625	1	0.6	0.3	0.6126	11692.3
HAI	6	19	0.5	0.636	0.692	0.417	0.667	0.5824	10260.7
HAI	6	20	0.737	0.571	0.714	0.5	0.2	0.5444	11196.8
HAI	6	21	0.588	0.6	0.667	0.467	0.3	0.5244	9885.69
HAI	6	22	0.562	0.8	0.583	0.611	0.5	0.6112	11385.6
HAI	6	23	0.722	0.692	0.722	0.5	0.364	0.6	2454.65
HAI	6	24	0.667	0.6	0.647	0.556	0.571	0.6082	30271.8
HAI	6	25	0.6	0.692	0.75	0.529	0.462	0.6066	2161.23
HAI	6	26	0.529	0.636	0.765	0.529	0.533	0.5984	20903.2
HAI	6	27	0.571	0.636	0.765	0.4	0.5	0.5744	21981.3
HAI	6	28	0.667	0.636	0.643	0.687	0.467	0.62	22471.4
HAI	6	29	0.588	0.556	0.687	0.667	0.625	0.6246	18425.7
HAI	6	30	0.611	0.375	0.643	0.429	0.455	0.5026	17717.2
HAI	6	31	0.5	0.714	0.75	0.417	0.333	0.5428	16966.7
HAI	6	32	0.357	0.636	0.765	0.538	0.333	0.5258	16519.8
HAI	6	33	0.611	0.6	0.625	0.437	0.462	0.547	20511
HAI	6	34	0.667	0.75	0.722	0.357	0.417	0.5826	25309.7
HAI	6	35	0.611	0.75	0.588	0.538	0.364	0.5702	21525.1
HAI	6	36	0.5	0.692	0.667	0.643	0.615	0.6234	21538.2
HAI	6	37	0.556	0.733	0.687	0.417	0.615	0.6016	25516.2
HAI	6	38	0.667	0.667	0.687	0.625	0.538	0.6368	26034.4
HAI	6	39	0.632	0.733	0.6	0.467	0.625	0.6114	25080.7
HAI	6	40	0.588	0.667	0.667	0.588	0.562	0.6144	27648.4
HAI	6	41	0.533	0.667	0.667	0.5	0.6	0.5934	23298.5
HAI	6	42	0.611	0.917	0.692	0.571	0.417	0.6416	23970.4
HAI	6	43	0.643	0.833	0.769	0.5	0.417	0.6324	10946
HAI	6	44	0.842	0.846	0.882	0.6	0.5	0.734	11592.1
HAI	6	45	0.765	0.6	0.909	0.5	0.222	0.5992	10815.8
HAI	6	46	0.643	0.75	0.6	0.429	0.333	0.551	29497.1
HAI	6	47	0.5	0.692	0.625	0.429	0.429	0.535	13852.1
HAI	6	48	0.529	0.692	0.562	0.308	0.385	0.4952	18136.8
HAI	6	49	0.562	0.667	0.667	0.692	0.385	0.5946	17133.3
HAI	6	50	0.4	0.769	0.714	0.632	0.5	0.603	24639.2
HAI	7	8	0.667	0.588	0.5	0.562	0.467	0.5568	26635.9
HAI	7	9	0.556	0.385	0.364	0.471	0.385	0.4322	315.52
HAI	7	10	0.524	0.611	0.692	0.786	0.353	0.5932	7070.59
HAI	7	11	0.6	0.643	0.462	0.571	0.286	0.5124	3324.15
HAI	7	12	0.556	0.6	0.462	0.615	0.385	0.5236	5940.98
HAI	7	13	0.85	0.765	0.632	0.579	0.6	0.6852	13407.8
HAI	7	14	0.737	0.765	0.667	0.562	0.647	0.6756	27626.2
HAI	7	15	0.696	0.812	0.643	0.571	0.647	0.6738	8238.8
HAI	7	16	0.722	0.643	0.714	0.385	0.333	0.5594	5959.88
HAI	7	17	0.7	0.667	0.733	0.588	0.385	0.6146	20194.4
HAI	7	18	0.6	0.786	0.9	0.687	0.333	0.6612	22950.3
HAI	7	19	0.55	0.6	0.545	0.417	0.467	0.5158	8284.1
HAI	7	20	0.471	0.667	0.692	0.6	0.25	0.536	22638.1
HAI	7	21	0.556	0.571	0.5	0.467	0.333	0.4854	8428.51
HAI	7	22	0.529	0.615	0.769	0.611	0.385	0.5818	23000.9
HAI	7	23	0.684	0.562	0.706	0.5	0.385	0.5674	20520.3
HAI	7	24	0.636	0.571	0.533	0.632	0.562	0.5868	11979.6
HAI	7	25	0.647	0.562	0.733	0.529	0.357	0.5656	20470.1
HAI	7	26	0.579	0.5	0.571	0.529	0.437	0.5232	25344.6
HAI	7	27	0.533	0.385	0.462	0.4	0.385	0.433	26774.6
HAI	7	28	0.375	0.5	0.5	0.6	0.267	0.4484	27203.6
HAI	7	29	0.471	0.417	0.571	0.588	0.437	0.4968	564.571
HAI	7	30	0.5	0.417	0.5	0.533	0.333	0.4566	622.193
HAI	7	31	0.471	0.5	0.643	0.643	0.083	0.468	1366.12
HAI	7	32	0.529	0.5	0.462	0.643	0.5	0.5268	2101.49
HAI	7	33	0.579	0.462	0.5	0.529	0.467	0.5074	24955.2
HAI	7	34	0.471	0.6	0.625	0.467	0.429	0.5184	7062.14
HAI	7	35	0.412	0.6	0.562	0.417	0.385	0.4752	3243.33
HAI	7	36	0.467	0.647	0.538	0.538	0.6	0.558	3227.28
HAI	7	37	0.6	0.437	0.333	0.538	0.5	0.4816	7295.25
HAI	7	38	0.556	0.625	0.571	0.533	0.429	0.5428	7780.35
HAI	7	39	0.6	0.529	0.571	0.562	0.529	0.5582	7051.76
HAI	7	40	0.556	0.632	0.538	0.588	0.471	0.557	9738.22
HAI	7	41	0.667	0.375	0.538	0.687	0.5	0.5534	5499.91
HAI	7	42	0.5	0.643	0.545	0.571	0.429	0.5376	6088.78
HAI	7	43	0.833	0.824	0.75	0.579	0.429	0.683	22448
HAI	7	44	0.737	0.833	0.714	0.6	0.5	0.6768	22574.5
HAI	7	45	0.722	0.667	1	0.667	0.417	0.6946	27327.9
HAI	7	46	0.6	0.687	0.571	0.429	0.357	0.5288	11183.6
HAI	7	47	0.647	0.357	0.385	0.625	0.333	0.4694	5346.52
HAI	7	48	0.5	0.562	0.625	0.533	0.286	0.5012	849.342
HAI	7	49	0.611	0.167	0.643	0.692	0.154	0.4534	1398.39
HAI	7	50	0.471	0.308	0.583	0.632	0.385	0.4758	6493.99
HAI	8	9	0.5	0.5	0.615	0.5	0.533	0.5296	26829.5
HAI	8	10	0.619	0.529	0.455	0.5	0.55	0.5306	29819.9
HAI	8	11	0.538	0.733	0.333	0.6	0.529	0.5466	29291.8
HAI	8	12	0.5	0.687	0.571	0.733	0.533	0.6048	28711.2
HAI	8	13	0.687	0.765	0.7	0.526	0.625	0.6606	19001.3
HAI	8	14	0.533	0.687	0.667	0.286	0.588	0.5522	18066.6
HAI	8	15	0.526	0.812	0.643	0.5	0.667	0.6296	18961.4
HAI	8	16	0.6	0.643	0.615	0.429	0.632	0.5838	21927.2
HAI	8	17	0.5	0.571	0.643	0.437	0.533	0.5368	21794.2
HAI	8	18	0.417	0.786	0.9	0.429	0.385	0.5834	10763.7
HAI	8	19	0.5	0.5	0.769	0.667	0.5	0.5872	21446.6
HAI	8	20	0.737	0.667	0.583	0.308	0.429	0.5448	11188.4
HAI	8	21	0.5	0.667	0.5	0.4	0.6	0.5334	22668.7
HAI	8	22	0.562	0.714	0.769	0.375	0.533	0.5906	11182.4
HAI	8	23	0.562	0.647	0.625	0.333	0.429	0.5192	23180
HAI	8	24	0.526	0.571	0.706	0.579	0.588	0.594	34460.8
HAI	8	25	0.6	0.562	0.643	0.375	0.5	0.536	21912.6
HAI	8	26	0.333	0.5	0.571	0.471	0.471	0.4692	1304.95
HAI	8	27	0.571	0.5	0.462	0.529	0.533	0.519	301.496
HAI	8	28	0.5	0.385	0.615	0.533	0.5	0.5066	773.886
HAI	8	29	0.588	0.538	0.667	0.684	0.632	0.6218	27146.6
HAI	8	30	0.611	0.417	0.714	0.562	0.5	0.5608	26431.2
HAI	8	31	0.4	0.5	0.643	0.571	0.5	0.5228	25683.8
HAI	8	32	0.357	0.5	0.571	0.571	0.538	0.5074	26483.5
HAI	8	33	0.437	0.462	0.5	0.556	0.5	0.491	1680.74
HAI	8	34	0.667	0.5	0.533	0.588	0.562	0.57	30479.1
HAI	8	35	0.529	0.5	0.467	0.571	0.533	0.52	29012.6
HAI	8	36	0.385	0.357	0.733	0.667	0.706	0.5696	28764
HAI	8	37	0.556	0.437	0.571	0.571	0.625	0.552	30468.4
HAI	8	38	0.588	0.533	0.571	0.562	0.562	0.5632	31013
HAI	8	39	0.632	0.611	0.462	0.667	0.632	0.6008	29462.6
HAI	8	40	0.4	0.267	0.643	0.684	0.579	0.5146	30720.7
HAI	8	41	0.429	0.632	0.643	0.533	0.437	0.5348	27903.6
HAI	8	42	0.529	0.643	0.667	0.765	0.562	0.6332	28436.6
HAI	8	43	0.538	0.75	0.75	0.444	0.467	0.5898	11385.8
HAI	8	44	0.625	0.687	0.8	0.167	0.529	0.5616	10667.8
HAI	8	45	0.385	0.571	1	0.611	0.462	0.6058	17847.4
HAI	8	46	0.417	0.5	0.667	0.647	0.5	0.5462	34359.1
HAI	8	47	0.385	0.467	0.6	0.647	0.556	0.531	21929.2
HAI	8	48	0.437	0.357	0.533	0.562	0.529	0.4836	25854.5
HAI	8	49	0.467	0.625	0.643	0.714	0.437	0.5772	25351.9
HAI	8	50	0.4	0.625	0.455	0.5	0.625	0.521	29574.7
HAI	9	10	0.368	0.625	0.786	0.6	0.5	0.5758	7243.98
HAI	9	11	0.5	0.545	0.571	0.737	0.357	0.542	3347.27
HAI	9	12	0.375	0.615	0.462	0.533	0.333	0.4636	6139.7
HAI	9	13	0.722	0.875	0.632	0.368	0.667	0.6528	13385.5
HAI	9	14	0.5	0.8	0.75	0.5	0.706	0.6512	27621
HAI	9	15	0.571	0.857	0.643	0.737	0.778	0.7172	8350.67
HAI	9	16	0.562	0.769	0.714	0.437	0.588	0.614	5989.58
HAI	9	17	0.7	0.583	0.643	0.526	0.462	0.5828	20111
HAI	9	18	0.5	0.833	0.9	0.529	0.643	0.681	23028.5
HAI	9	19	0.389	0.615	0.667	0.467	0.429	0.5134	8255.45
HAI	9	20	0.556	0.556	0.692	0.529	0.571	0.5808	22711.2
HAI	9	21	0.375	0.692	0.75	0.2	0.538	0.511	8347.08
HAI	9	22	0.437	0.75	0.769	0.55	0.571	0.6154	23073.4
HAI	9	23	0.437	0.667	0.706	0.444	0.571	0.565	20416.8
HAI	9	24	0.5	0.692	0.533	0.5	0.706	0.5862	12095.3
HAI	9	25	0.562	0.667	0.643	0.389	0.625	0.5772	20385.7
HAI	9	26	0.312	0.5	0.462	0.294	0.588	0.4312	25540
HAI	9	27	0.308	0.615	0.462	0.353	0.571	0.4618	26970.6
HAI	9	28	0.375	0.5	0.615	0.529	0.437	0.4912	27402
HAI	9	29	0.267	0.222	0.462	0.444	0.5	0.379	317.309
HAI	9	30	0.412	0.4	0.714	0.471	0.1	0.4194	524.623
HAI	9	31	0.267	0.5	0.538	0.562	0.429	0.4592	1363.12
HAI	9	32	0.437	0.5	0.333	0.562	0.583	0.483	1887.26
HAI	9	33	0.5	0.455	0.6	0.474	0.533	0.5124	25149
HAI	9	34	0.471	0.364	0.625	0.412	0.5	0.4744	7204.22
HAI	9	35	0.412	0.615	0.647	0.562	0.462	0.5396	3300.06
HAI	9	36	0.467	0.667	0.538	0.562	0.571	0.561	3316.36
HAI	9	37	0.25	0.533	0.462	0.562	0.571	0.4756	7444.77
HAI	9	38	0.471	0.643	0.462	0.632	0.25	0.4916	7918.17
HAI	9	39	0.353	0.625	0.75	0.412	0.5	0.528	7239.91
HAI	9	40	0.375	0.647	0.538	0.526	0.529	0.523	9930.57
HAI	9	41	0.5	0.467	0.643	0.529	0.467	0.5212	5726.61
HAI	9	42	0.312	0.769	0.667	0.588	0.5	0.5672	6301.84
HAI	9	43	0.6	0.786	0.75	0.368	0.687	0.6382	22518.7
HAI	9	44	0.667	0.8	0.714	0.611	0.722	0.7028	22654.8
HAI	9	45	0.647	0.692	1	0.526	0.5	0.673	27324.1
HAI	9	46	0.5	0.615	0.571	0.471	0.429	0.5172	11279.5
HAI	9	47	0.467	0.333	0.6	0.556	0.4	0.4712	5421.55
HAI	9	48	0.412	0.462	0.625	0.471	0.357	0.4654	1134.21
HAI	9	49	0.333	0.417	0.538	0.765	0.357	0.482	1510.33
HAI	9	50	0.375	0.417	0.583	0.636	0.571	0.5164	6664.71
HAI	10	11	0.556	0.667	0.417	0.846	0.235	0.5442	4545.06
HAI	10	12	0.368	0.533	0.643	0.556	0.5	0.52	1294.48
HAI	10	13	0.667	0.778	0.684	0.625	0.714	0.6936	19947.1
HAI	10	14	0.619	0.778	0.643	0.615	0.682	0.6674	33882.8
HAI	10	15	0.542	0.889	0.714	0.846	0.682	0.7346	13768.5
HAI	10	16	0.526	0.75	0.692	0.667	0.45	0.617	12391.7
HAI	10	17	0.652	0.765	0.5	0.643	0.5	0.612	27048.3
HAI	10	18	0.632	0.875	0.889	0.4	0.556	0.6704	28304.6
HAI	10	19	0.522	0.706	0.636	0.727	0.389	0.596	14964.3
HAI	10	20	0.591	0.692	0.4	0.545	0.5	0.5456	28066.7
HAI	10	21	0.45	0.765	0.6	0.5	0.556	0.5742	15344.2
HAI	10	22	0.5	0.812	0.846	0.571	0.5	0.6458	28430.8
HAI	10	23	0.571	0.737	0.765	0.643	0.5	0.6432	27461.6
HAI	10	24	0.478	0.6	0.765	0.687	0.55	0.616	5242.09
HAI	10	25	0.667	0.667	0.714	0.571	0.55	0.6338	27327.9
HAI	10	26	0.545	0.706	0.643	0.571	0.591	0.6112	28519.7
HAI	10	27	0.5	0.625	0.538	0.733	0.579	0.595	29895.5
HAI	10	28	0.45	0.625	0.786	0.545	0.4	0.5612	30256.8
HAI	10	29	0.368	0.667	0.643	0.643	0.368	0.5378	7145.22
HAI	10	30	0.609	0.667	0.583	0.583	0.471	0.5826	7692.77
HAI	10	31	0.45	0.529	0.615	0.6	0.294	0.4976	8327.94
HAI	10	32	0.5	0.778	0.733	0.6	0.588	0.6398	9125.64
HAI	10	33	0.667	0.687	0.571	0.667	0.55	0.6284	28180.7
HAI	10	34	0.45	0.625	0.6	0.714	0.353	0.5484	819.561
HAI	10	35	0.476	0.778	0.533	0.727	0.412	0.5852	4338.91
HAI	10	36	0.6	0.667	0.8	0.727	0.5	0.6588	4140.09
HAI	10	37	0.263	0.471	0.538	0.6	0.579	0.4902	674.337
HAI	10	38	0.45	0.562	0.538	0.692	0.526	0.5536	1193.12
HAI	10	39	0.429	0.556	0.538	0.714	0.524	0.5522	408.208
HAI	10	40	0.368	0.312	0.615	0.733	0.4	0.4856	2748.04
HAI	10	41	0.389	0.5	0.615	0.545	0.571	0.524	2077.91
HAI	10	42	0.316	0.667	0.75	0.75	0.444	0.5854	1432.2
HAI	10	43	0.7	0.895	0.833	0.625	0.6	0.7306	27910.3
HAI	10	44	0.739	0.9	0.867	0.545	0.636	0.7374	27906.5
HAI	10	45	0.727	0.765	1	0.733	0.611	0.7672	33573.7
HAI	10	46	0.556	0.706	0.538	0.786	0.474	0.612	4749.79
HAI	10	47	0.526	0.588	0.462	0.692	0.278	0.5092	11515.4
HAI	10	48	0.316	0.5	0.6	0.692	0.421	0.5058	7083.62
HAI	10	49	0.5	0.647	0.714	0.667	0.235	0.5526	8087.38
HAI	10	50	0.45	0.562	0.4	0.765	0.579	0.5512	582.163
HAI	11	12	0.385	0.545	0.533	0.857	0.357	0.5354	3813.45
HAI	11	13	0.8	0.933	0.6	0.75	0.647	0.746	16727.7
HAI	11	14	0.538	0.857	0.706	0.6	0.611	0.6624	30950.3
HAI	11	15	0.529	0.833	0.687	0.5	0.684	0.6466	11401
HAI	11	16	0.364	0.727	0.667	0.643	0.412	0.5626	9274.62
HAI	11	17	0.687	0.636	0.6	0.706	0.357	0.5972	23430.3
HAI	11	18	0.545	0.8	0.917	0.733	0.533	0.7056	26169.1
HAI	11	19	0.588	0.667	0.615	0.692	0.437	0.5998	11599.9
HAI	11	20	0.687	0.625	0.417	0.643	0.467	0.5678	25869.8
HAI	11	21	0.385	0.75	0.583	0.687	0.429	0.5668	11676.5
HAI	11	22	0.333	0.7	0.714	0.722	0.562	0.6062	26233.7
HAI	11	23	0.571	0.714	0.667	0.625	0.467	0.6088	23703
HAI	11	24	0.684	0.636	0.588	0.737	0.529	0.6348	8910.67
HAI	11	25	0.5	0.714	0.687	0.722	0.529	0.6304	23703.6
HAI	11	26	0.533	0.667	0.429	0.789	0.579	0.5994	27990.2
HAI	11	27	0.583	0.769	0.533	0.706	0.562	0.6306	29410.9
HAI	11	28	0.5	0.857	0.571	0.812	0.353	0.6186	29820.3
HAI	11	29	0.385	0.6	0.533	0.778	0.312	0.5216	3123.47
HAI	11	30	0.706	0.727	0.571	0.75	0.308	0.6124	3870.32
HAI	11	31	0.5	0.538	0.5	0.583	0.214	0.467	4685.5
HAI	11	32	0.462	0.667	0.533	0.692	0.462	0.5632	5042.69
HAI	11	33	0.706	0.636	0.357	0.789	0.437	0.585	27614.7
HAI	11	34	0.5	0.667	0.5	0.687	0.286	0.528	4251.57
HAI	11	35	0.429	0.545	0.214	0.455	0.357	0.4	360.555
HAI	11	36	0.5	0.714	0.5	0.583	0.357	0.5308	704.911
HAI	11	37	0.467	0.571	0.533	0.692	0.467	0.546	4535.41
HAI	11	38	0.5	0.786	0.429	0.462	0.4	0.5154	4909.18
HAI	11	39	0.562	0.75	0.533	0.687	0.5	0.6064	4685.22
HAI	11	40	0.385	0.6	0.385	0.625	0.353	0.4696	7284.85
HAI	11	41	0.417	0.6	0.385	0.643	0.471	0.5032	3832.75
HAI	11	42	0.429	0.727	0.5	0.615	0.286	0.5114	4131.14
HAI	11	43	0.545	0.846	0.786	0.75	0.588	0.703	25685.2
HAI	11	44	0.733	0.857	0.75	0.643	0.632	0.723	25788.1
HAI	11	45	0.615	0.846	1	0.706	0.5	0.7334	30652
HAI	11	46	0.4	0.667	0.429	0.667	0.333	0.4992	8028.08
HAI	11	47	0.5	0.714	0.467	0.667	0.2	0.5096	8612.9
HAI	11	48	0.429	0.5	0.4	0.571	0.267	0.4334	3800.17
HAI	11	49	0.462	0.583	0.5	0.636	0.143	0.4648	4682.64
HAI	11	50	0.385	0.583	0.273	0.737	0.467	0.489	3983.77
HAI	12	13	0.647	0.875	0.6	0.647	0.571	0.668	18667.6
HAI	12	14	0.588	0.8	0.625	0.733	0.706	0.6904	32588.9
HAI	12	15	0.421	0.857	0.687	0.857	0.706	0.7056	12474.5
HAI	12	16	0.467	0.769	0.75	0.583	0.588	0.6314	11119.5
HAI	12	17	0.7	0.692	0.6	0.667	0.462	0.6242	25796
HAI	12	18	0.5	0.833	0.917	0.692	0.538	0.696	27027.9
HAI	12	19	0.474	0.714	0.615	0.5	0.533	0.5672	13703.5
HAI	12	20	0.556	0.556	0.643	0.692	0.462	0.5818	26786.8
HAI	12	21	0.267	0.692	0.583	0.538	0.417	0.4994	14116.5
HAI	12	22	0.333	0.75	0.875	0.765	0.667	0.678	27151
HAI	12	23	0.529	0.667	0.737	0.667	0.462	0.6124	26227.1
HAI	12	24	0.571	0.583	0.588	0.706	0.625	0.6146	6536.54
HAI	12	25	0.562	0.667	0.687	0.687	0.625	0.6456	26076.1
HAI	12	26	0.412	0.615	0.625	0.6	0.588	0.568	27408.8
HAI	12	27	0.429	0.615	0.429	0.571	0.571	0.523	28793.4
HAI	12	28	0.375	0.714	0.667	0.583	0.437	0.5552	29162.7
HAI	12	29	0.375	0.545	0.533	0.667	0.5	0.524	6073.34
HAI	12	30	0.579	0.545	0.571	0.714	0.273	0.5364	6560.78
HAI	12	31	0.471	0.5	0.687	0.636	0.429	0.5446	7149.89
HAI	12	32	0.437	0.714	0.429	0.636	0.455	0.5342	8026.81
HAI	12	33	0.579	0.692	0.562	0.6	0.533	0.5932	27063.8
HAI	12	34	0.471	0.714	0.667	0.538	0.5	0.578	1778.87
HAI	12	35	0.412	0.714	0.611	0.636	0.462	0.567	3538.42
HAI	12	36	0.467	0.75	0.687	0.75	0.462	0.6232	3273.55
HAI	12	37	0.353	0.533	0.429	0.5	0.667	0.4964	1825.21
HAI	12	38	0.471	0.643	0.533	0.714	0.5	0.5722	2398.83
HAI	12	39	0.444	0.625	0.706	0.538	0.5	0.5626	1140.3
HAI	12	40	0.267	0.562	0.5	0.571	0.437	0.4674	3799.71
HAI	12	41	0.286	0.467	0.6	0.692	0.562	0.5214	820
HAI	12	42	0.2	0.769	0.615	0.667	0.385	0.5272	398.283
HAI	12	43	0.6	0.867	0.867	0.722	0.6	0.7312	26629
HAI	12	44	0.667	0.875	0.824	0.692	0.647	0.741	26630.5
HAI	12	45	0.647	0.692	1	0.667	0.5	0.7012	32279.7
HAI	12	46	0.385	0.714	0.429	0.714	0.429	0.5342	6021.99
HAI	12	47	0.467	0.667	0.562	0.615	0.4	0.5422	10233.7
HAI	12	48	0.412	0.462	0.588	0.615	0.467	0.5088	5880.93
HAI	12	49	0.437	0.643	0.6	0.7	0.357	0.5474	6878.8
HAI	12	50	0.267	0.643	0.643	0.778	0.571	0.5804	876
HAI	13	14	0.765	0.941	0.667	0.6	0.625	0.7196	14266
HAI	13	15	0.773	0.933	0.714	0.75	0.778	0.7896	6824.95
HAI	13	16	0.824	1	0.7	0.556	0.737	0.7634	7568.38
HAI	13	17	0.722	0.937	0.65	0.55	0.571	0.686	7487.46
HAI	13	18	0.714	0.923	0.882	0.556	0.643	0.7436	11116.6
HAI	13	19	0.632	0.714	0.667	0.588	0.778	0.6758	5131.74
HAI	13	20	0.562	0.818	0.611	0.632	0.462	0.617	10680.2
HAI	13	21	0.722	0.786	0.647	0.353	0.538	0.6092	5398.34
HAI	13	22	0.778	0.846	0.8	0.5	0.667	0.7182	11001.6
HAI	13	23	0.778	0.889	0.75	0.619	0.667	0.7406	8300.42
HAI	13	24	0.773	0.867	0.571	0.652	0.778	0.7282	25139
HAI	13	25	0.75	0.889	0.714	0.5	0.706	0.7118	7768.28
HAI	13	26	0.737	0.875	0.6	0.421	0.667	0.66	17968.3
HAI	13	27	0.643	0.714	0.6	0.55	0.667	0.6348	19250.4
HAI	13	28	0.789	0.8	0.632	0.556	0.684	0.6922	19749.7
HAI	13	29	0.789	0.857	0.526	0.55	0.8	0.7044	13631.2
HAI	13	30	0.8	0.857	0.632	0.579	0.643	0.7022	12861
HAI	13	31	0.722	0.765	0.714	0.737	0.625	0.7126	12043.1
HAI	13	32	0.706	0.941	0.6	0.667	0.692	0.7212	11909.3
HAI	13	33	0.667	0.937	0.619	0.333	0.625	0.6362	17547.5
HAI	13	34	0.789	0.8	0.696	0.444	0.6	0.6658	20163.7
HAI	13	35	0.8	0.875	0.591	0.667	0.571	0.7008	16647.8
HAI	13	36	0.667	0.889	0.65	0.588	0.75	0.7088	16603.1
HAI	13	37	0.684	0.706	0.526	0.667	0.667	0.65	20341.4
HAI	13	38	0.789	0.643	0.6	0.579	0.5	0.6222	20885.5
HAI	13	39	0.75	0.706	0.667	0.6	0.667	0.678	19795.1
HAI	13	40	0.647	0.789	0.5	0.619	0.684	0.6478	22267.2
HAI	13	41	0.6	0.789	0.579	0.632	0.647	0.6494	17969.3
HAI	13	42	0.667	0.769	0.667	0.684	0.5	0.6574	18650.3
HAI	13	43	0.8	1	0.85	0.545	0.687	0.7764	10438.9
HAI	13	44	0.765	1	0.87	0.556	0.722	0.7826	10833.6
HAI	13	45	0.667	0.867	0.944	0.619	0.5	0.7194	13975.2
HAI	13	46	0.714	0.714	0.444	0.65	0.625	0.6294	24453.7
HAI	13	47	0.75	0.75	0.55	0.579	0.588	0.6434	8434.7
HAI	13	48	0.667	0.824	0.421	0.65	0.647	0.6418	13071.9
HAI	13	49	0.625	0.882	0.5	0.778	0.647	0.6864	12099.4
HAI	13	50	0.722	0.812	0.75	0.708	0.667	0.7318	19424.1
HAI	14	15	0.444	0.667	0.687	0.5	0.5	0.5596	20152.8
HAI	14	16	0.5	0.667	0.667	0.429	0.471	0.5468	21697
HAI	14	17	0.5	0.583	0.6	0.333	0.533	0.5098	9527.25
HAI	14	18	0.643	0.727	0.917	0.533	0.5	0.664	8152.08
HAI	14	19	0.5	0.714	0.615	0.667	0.737	0.6466	19387.6
HAI	14	20	0.737	0.818	0.643	0.308	0.533	0.6078	7967.65
HAI	14	21	0.5	0.867	0.583	0.4	0.6	0.59	19592
HAI	14	22	0.467	0.846	0.714	0.375	0.625	0.6054	7750.68
HAI	14	23	0.357	0.571	0.5	0.214	0.533	0.435	10381.7
HAI	14	24	0.526	0.455	0.667	0.5	0.737	0.577	39121.6
HAI	14	25	0.385	0.462	0.6	0.375	0.5	0.4644	9387.25
HAI	14	26	0.529	0.8	0.706	0.556	0.632	0.6446	17923.2
HAI	14	27	0.571	0.714	0.625	0.529	0.429	0.5736	18363
HAI	14	28	0.5	0.714	0.571	0.429	0.579	0.5586	18739.8
HAI	14	29	0.588	0.769	0.706	0.684	0.7	0.6894	27875.4
HAI	14	30	0.611	0.667	0.75	0.647	0.687	0.6724	27096.5
HAI	14	31	0.5	0.833	0.765	0.571	0.667	0.6672	26267.7
HAI	14	32	0.562	0.714	0.625	0.462	0.643	0.6012	26175.3
HAI	14	33	0.684	0.692	0.647	0.556	0.5	0.6158	17677.5
HAI	14	34	0.737	0.8	0.737	0.5	0.722	0.6992	34184
HAI	14	35	0.529	0.8	0.684	0.571	0.706	0.658	30851.6
HAI	14	36	0.6	0.824	0.765	0.571	0.625	0.677	30785.3
HAI	14	37	0.632	0.778	0.533	0.571	0.625	0.6278	34335.4
HAI	14	38	0.737	0.812	0.706	0.562	0.722	0.7078	34895.4
HAI	14	39	0.632	0.842	0.625	0.667	0.7	0.6932	33685.9
HAI	14	40	0.4	0.722	0.6	0.684	0.714	0.624	35996.2
HAI	14	41	0.625	0.722	0.687	0.533	0.684	0.6502	31839.8
HAI	14	42	0.529	0.857	0.714	0.765	0.722	0.7174	32519.7
HAI	14	43	0.417	0.583	0.583	0.526	0.467	0.5152	7924.61
HAI	14	44	0.533	0.364	0.667	0.308	0.333	0.441	8465.75
HAI	14	45	0.5	0.583	0.818	0.529	0.571	0.6002	320.156
HAI	14	46	0.643	0.8	0.533	0.562	0.667	0.641	38513.4
HAI	14	47	0.6	0.824	0.647	0.647	0.632	0.67	22459
HAI	14	48	0.529	0.824	0.667	0.562	0.611	0.6386	27231.9
HAI	14	49	0.357	0.733	0.765	0.714	0.684	0.6506	26285.5
HAI	14	50	0.588	0.733	0.733	0.412	0.706	0.6344	33392.9
HAI	15	16	0.412	0.727	0.643	0.538	0.632	0.5904	2988.04
HAI	15	17	0.571	0.636	0.667	0.533	0.625	0.6064	14311.8
HAI	15	18	0.611	0.286	0.909	0.733	0.5	0.6078	14776.5
HAI	15	19	0.565	0.769	0.867	0.692	0.737	0.726	3722.74
HAI	15	20	0.696	0.778	0.8	0.538	0.625	0.6874	14488.5
HAI	15	21	0.421	0.75	0.769	0.687	0.687	0.6628	5117.43
HAI	15	22	0.474	0.818	0.867	0.562	0.625	0.6692	14853.2
HAI	15	23	0.55	0.8	0.647	0.533	0.533	0.6126	15077
HAI	15	24	0.522	0.636	0.789	0.737	0.667	0.6702	19009.8
HAI	15	25	0.5	0.615	0.571	0.647	0.5	0.5666	14592.9
HAI	15	26	0.524	0.857	0.833	0.722	0.7	0.7272	17708.9
HAI	15	27	0.632	0.857	0.6	0.625	0.625	0.6678	19134.8
HAI	15	28	0.5	0.857	0.812	0.733	0.579	0.6962	19594.8
HAI	15	29	0.5	0.833	0.687	0.842	0.762	0.7248	8658.23
HAI	15	30	0.591	0.727	0.733	0.667	0.765	0.6966	7873.97
HAI	15	31	0.571	0.882	0.824	0.692	0.667	0.7272	7047.95
HAI	15	32	0.474	0.769	0.687	0.583	0.643	0.6312	7620.58
HAI	15	33	0.652	0.75	0.625	0.647	0.667	0.6682	17299.1
HAI	15	34	0.636	0.933	0.789	0.687	0.722	0.7534	14124.6
HAI	15	35	0.591	0.769	0.737	0.583	0.706	0.6772	11218.6
HAI	15	36	0.579	0.8	0.889	0.692	0.778	0.7476	11074.8
HAI	15	37	0.476	0.889	0.687	0.692	0.706	0.69	14253.7
HAI	15	38	0.636	0.867	0.687	0.667	0.789	0.7292	14821.9
HAI	15	39	0.609	0.889	0.765	0.765	0.762	0.758	13553.9
HAI	15	40	0.421	0.833	0.824	0.778	0.714	0.714	15846.1
HAI	15	41	0.444	0.895	0.889	0.733	0.75	0.7422	11708.2
HAI	15	42	0.524	0.923	0.867	0.8	0.722	0.7672	12385
HAI	15	43	0.529	0.75	0.769	0.684	0.467	0.6398	14310.7
HAI	15	44	0.6	0.769	0.733	0.538	0.333	0.5946	14392.7
HAI	15	45	0.579	0.75	1	0.625	0.667	0.7242	19840.7
HAI	15	46	0.529	0.857	0.687	0.667	0.588	0.6656	18459.9
HAI	15	47	0.579	0.875	0.778	0.75	0.7	0.7364	3023.94
HAI	15	48	0.524	0.875	0.647	0.667	0.684	0.6794	7613.43
HAI	15	49	0.474	0.786	0.75	0.636	0.684	0.666	6846.57
HAI	15	50	0.5	0.867	0.714	0.588	0.706	0.675	13300.3
HAI	16	17	0.647	0.636	0.538	0.357	0.5	0.5356	14719.1
HAI	16	18	0.615	0.667	0.9	0.571	0.467	0.644	17114.2
HAI	16	19	0.556	0.769	0.769	0.5	0.632	0.6452	2637.95
HAI	16	20	0.722	0.778	0.786	0.333	0.5	0.6238	16780
HAI	16	21	0.357	0.636	0.636	0.429	0.562	0.524	3476.28
HAI	16	22	0.308	0.556	0.667	0.5	0.5	0.5062	17140.1
HAI	16	23	0.533	0.615	0.625	0.357	0.4	0.506	15238.3
HAI	16	24	0.579	0.5	0.533	0.529	0.632	0.5546	17571.6
HAI	16	25	0.462	0.5	0.417	0.5	0.375	0.4508	15000.8
HAI	16	26	0.5	0.769	0.571	0.4	0.6	0.568	20681.1
HAI	16	27	0.643	0.667	0.667	0.231	0.286	0.4988	22104.7
HAI	16	28	0.467	0.769	0.714	0.333	0.389	0.5344	22567.6
HAI	16	29	0.467	0.727	0.75	0.647	0.526	0.6234	6268
HAI	16	30	0.737	0.6	0.8	0.5	0.562	0.6398	5472.09
HAI	16	31	0.562	0.643	0.733	0.5	0.375	0.5626	4626.63
HAI	16	32	0.429	0.667	0.571	0.5	0.6	0.5534	4878.69
HAI	16	33	0.667	0.5	0.385	0.4	0.556	0.5016	20269.5
HAI	16	34	0.647	0.933	0.778	0.429	0.611	0.6796	12595.5
HAI	16	35	0.5	0.545	0.647	0.364	0.588	0.5288	9160.81
HAI	16	36	0.571	0.615	0.733	0.5	0.588	0.6014	9088.39
HAI	16	37	0.437	0.75	0.75	0.5	0.588	0.605	12775.2
HAI	16	38	0.647	0.786	0.667	0.5	0.611	0.6422	13317.7
HAI	16	39	0.684	0.824	0.571	0.533	0.667	0.6558	12252.8
HAI	16	40	0.467	0.687	0.812	0.562	0.619	0.6294	14775.8
HAI	16	41	0.385	0.765	0.733	0.571	0.65	0.6208	10442.5
HAI	16	42	0.5	0.6	0.769	0.643	0.611	0.6246	11120.3
HAI	16	43	0.364	0.75	0.5	0.471	0.437	0.5044	16580.7
HAI	16	44	0.687	0.769	0.615	0.462	0.412	0.589	16749
HAI	16	45	0.571	0.75	0.9	0.467	0.625	0.6626	21396
HAI	16	46	0.5	0.857	0.667	0.5	0.556	0.616	16887.9
HAI	16	47	0.571	0.8	0.687	0.6	0.526	0.6368	1015.97
HAI	16	48	0.5	0.714	0.533	0.5	0.412	0.5318	5535.22
HAI	16	49	0.533	0.583	0.812	0.667	0.412	0.6014	4594.65
HAI	16	50	0.467	0.692	0.583	0.611	0.588	0.5882	11862.6
HAI	17	18	0.6	0.556	0.909	0.562	0.538	0.633	11387.7
HAI	17	19	0.55	0.583	0.692	0.6	0.533	0.5916	12100.3
HAI	17	20	0.818	0.667	0.5	0.357	0.462	0.5608	10901.6
HAI	17	21	0.632	0.769	0.769	0.437	0.417	0.6048	11766.1
HAI	17	22	0.529	0.727	0.867	0.312	0.462	0.5794	11035.7
HAI	17	23	0.529	0.643	0.722	0.267	0.462	0.5246	1385.78
HAI	17	24	0.636	0.4	0.647	0.526	0.625	0.5668	32145
HAI	17	25	0.357	0.538	0.462	0.5	0.533	0.478	282.843
HAI	17	26	0.579	0.692	0.6	0.5	0.5	0.5742	21094.3
HAI	17	27	0.706	0.692	0.6	0.471	0.333	0.5604	22085.7
HAI	17	28	0.7	0.692	0.812	0.357	0.437	0.5996	22565.7
HAI	17	29	0.762	0.636	0.765	0.632	0.588	0.6766	20311.4
HAI	17	30	0.65	0.5	0.733	0.588	0.417	0.5776	19599.7
HAI	17	31	0.632	0.667	0.75	0.6	0.308	0.5914	18844.7
HAI	17	32	0.611	0.583	0.6	0.6	0.583	0.5954	18409.4
HAI	17	33	0.5	0.545	0.533	0.412	0.429	0.4838	20718.3
HAI	17	34	0.7	0.692	0.789	0.529	0.5	0.642	27179.2
HAI	17	35	0.65	0.583	0.667	0.5	0.571	0.5942	23409.6
HAI	17	36	0.562	0.643	0.75	0.687	0.571	0.6426	23420
HAI	17	37	0.667	0.765	0.687	0.6	0.462	0.6362	27383.2
HAI	17	38	0.818	0.8	0.687	0.667	0.5	0.6944	27904.1
HAI	17	39	0.783	0.833	0.6	0.684	0.588	0.6976	26934.9
HAI	17	40	0.632	0.625	0.667	0.7	0.529	0.6306	29490.4
HAI	17	41	0.667	0.778	0.667	0.562	0.562	0.6472	25145.4
HAI	17	42	0.714	0.846	0.867	0.778	0.5	0.741	25819.1
HAI	17	43	0.5	0.545	0.769	0.55	0.5	0.5728	10663.3
HAI	17	44	0.5	0.583	0.733	0.467	0.562	0.569	11352.8
HAI	17	45	0.467	0.545	1	0.375	0.364	0.5502	9339.21
HAI	17	46	0.687	0.692	0.5	0.5	0.533	0.5824	31376.6
HAI	17	47	0.647	0.733	0.625	0.667	0.4	0.6144	15669.6
HAI	17	48	0.5	0.643	0.647	0.5	0.467	0.5514	20006.8
HAI	17	49	0.611	0.615	0.667	0.733	0.357	0.5966	19004.3
HAI	17	50	0.556	0.714	0.5	0.526	0.571	0.5734	26501.5
HAI	18	19	0.5	0.727	0.875	0.615	0.6	0.6634	15448
HAI	18	20	0.687	0.714	0.889	0.462	0.273	0.605	495.782
HAI	18	21	0.5	0.7	0.857	0.429	0.5	0.5972	16204.9
HAI	18	22	0.462	0.778	0.875	0.5	0.538	0.6306	431.045
HAI	18	23	0.571	0.769	0.929	0.562	0.273	0.6208	12753.4
HAI	18	24	0.611	0.556	0.929	0.611	0.5	0.6414	33494.2
HAI	18	25	0.5	0.545	0.909	0.5	0.25	0.5408	11461.2
HAI	18	26	0.533	0.833	0.917	0.4	0.562	0.649	10317.5
HAI	18	27	0.583	0.833	0.917	0.562	0.417	0.6624	11064.4
HAI	18	28	0.5	0.833	0.9	0.571	0.5	0.6608	11512.2
HAI	18	29	0.6	0.8	0.917	0.647	0.647	0.7222	23323.9
HAI	18	30	0.533	0.667	0.9	0.6	0.615	0.663	22527
HAI	18	31	0.385	0.867	0.909	0.615	0.385	0.6322	21681.8
HAI	18	32	0.333	0.727	0.917	0.615	0.4	0.5984	21974.4
HAI	18	33	0.533	0.7	0.923	0.5	0.6	0.6512	10004.5
HAI	18	34	0.6	0.923	0.929	0.625	0.571	0.7296	28746.5
HAI	18	35	0.533	0.727	0.933	0.615	0.538	0.6692	25993.3
HAI	18	36	0.364	0.769	0.909	0.615	0.643	0.66	25851.2
HAI	18	37	0.562	0.875	0.917	0.615	0.538	0.7014	28844.3
HAI	18	38	0.687	0.846	0.917	0.6	0.667	0.7434	29418.4
HAI	18	39	0.647	0.875	0.917	0.533	0.722	0.7388	28043.1
HAI	18	40	0.5	0.812	0.909	0.647	0.588	0.6912	30067.1
HAI	18	41	0.417	0.882	0.909	0.462	0.625	0.659	26226.9
HAI	18	42	0.533	0.909	0.875	0.812	0.571	0.74	26882
HAI	18	43	0.545	0.7	0.857	0.471	0.182	0.551	749.533
HAI	18	44	0.643	0.833	0.9	0.462	0.308	0.6292	407.185
HAI	18	45	0.615	0.7	1	0.722	0.455	0.6984	7866.95
HAI	18	46	0.222	0.833	0.917	0.687	0.5	0.6318	33049.8
HAI	18	47	0.364	0.857	0.923	0.6	0.562	0.6612	17607.4
HAI	18	48	0.533	0.857	0.929	0.6	0.533	0.6904	22372.1
HAI	18	49	0.462	0.75	1	0.667	0.429	0.6616	21552
HAI	18	50	0.385	0.846	0.889	0.684	0.538	0.6684	27884.8
HAI	19	20	0.474	0.556	0.5	0.615	0.625	0.554	15070.4
HAI	19	21	0.389	0.692	0.556	0.462	0.6	0.5398	1420.03
HAI	19	22	0.353	0.75	0.727	0.706	0.429	0.593	15420.3
HAI	19	23	0.444	0.75	0.824	0.5	0.625	0.6286	12601.3
HAI	19	24	0.5	0.583	0.571	0.647	0.667	0.5936	20106.9
HAI	19	25	0.471	0.667	0.786	0.533	0.588	0.609	12381.3
HAI	19	26	0.333	0.714	0.5	0.429	0.632	0.5216	20257.7
HAI	19	27	0.437	0.5	0.714	0.385	0.625	0.5322	21651.9
HAI	19	28	0.389	0.615	0.545	0.615	0.5	0.5328	22133.8
HAI	19	29	0.474	0.667	0.615	0.5	0.375	0.5262	8499.57
HAI	19	30	0.5	0.545	0.545	0.643	0.385	0.5236	7731.17
HAI	19	31	0.389	0.6	0.583	0.545	0.4	0.5034	6918.17
HAI	19	32	0.444	0.714	0.615	0.667	0.643	0.6166	6801.35
HAI	19	33	0.333	0.692	0.538	0.533	0.667	0.5526	19836.3
HAI	19	34	0.55	0.615	0.571	0.462	0.562	0.552	15129.8
HAI	19	35	0.421	0.615	0.6	0.4	0.625	0.5322	11526.8
HAI	19	36	0.471	0.75	0.455	0.545	0.533	0.5508	11491.8
HAI	19	37	0.524	0.625	0.5	0.545	0.533	0.5454	15321.9
HAI	19	38	0.619	0.643	0.5	0.643	0.562	0.5934	15854.3
HAI	19	39	0.524	0.706	0.5	0.462	0.556	0.5496	14841
HAI	19	40	0.474	0.562	0.3	0.6	0.412	0.4696	17390.4
HAI	19	41	0.579	0.647	0.3	0.5	0.529	0.511	13045.6
HAI	19	42	0.421	0.769	0.444	0.583	0.562	0.5558	13720.1
HAI	19	43	0.588	0.786	0.7	0.588	0.647	0.6618	14852.3
HAI	19	44	0.579	0.8	0.667	0.615	0.684	0.669	15108.8
HAI	19	45	0.556	0.692	0.875	0.6	0.667	0.678	19094
HAI	19	46	0.588	0.5	0.364	0.417	0.588	0.4914	19385.9
HAI	19	47	0.471	0.667	0.417	0.417	0.471	0.4886	3628.44
HAI	19	48	0.421	0.667	0.667	0.417	0.611	0.5566	7984.71
HAI	19	49	0.353	0.733	0.692	0.6	0.333	0.5422	6998
HAI	19	50	0.294	0.643	0.636	0.722	0.533	0.5656	14424.7
HAI	20	21	0.556	0.667	0.727	0.429	0.273	0.5304	15803.6
HAI	20	22	0.611	0.75	0.75	0.5	0.462	0.6146	364.966
HAI	20	23	0.684	0.846	0.833	0.357	0.333	0.6106	12269.3
HAI	20	24	0.696	0.667	0.765	0.529	0.533	0.638	33266.3
HAI	20	25	0.722	0.75	0.8	0.5	0.429	0.6402	10977.7
HAI	20	26	0.65	0.7	0.538	0.5	0.5	0.5776	10710.5
HAI	20	27	0.429	0.7	0.643	0.467	0.462	0.5402	11488.5
HAI	20	28	0.471	0.7	0.583	0.462	0.437	0.5306	11941.1
HAI	20	29	0.556	0.429	0.643	0.722	0.588	0.5876	23004.6
HAI	20	30	0.579	0.429	0.692	0.6	0.538	0.5676	22207.1
HAI	20	31	0.632	0.667	0.714	0.5	0.308	0.5642	21361.1
[truncated: 1,679 more rows]

## Sheet: species numbers and turnover
Appendix S4. Relevant data as used for nls() modelling							(original file name: data bird randomness turn over birds in forest.xlxs)
Renner, Gossner, Kahl, Kalko, Weisser, et al.
persistent species	turn over species	% presistent sp	% turnover species	80% cutoff	70% cutoff	60% cutoff	EP_Pl0tid
8	16	0.333	0.667			1	AEW01
9	14	0.391	0.609			1	AEW02
10	12	0.455	0.545				AEW03
1	15	0.063	0.938	1	1	1	AEW04
10	16	0.385	0.615			1	AEW05
11	14	0.44	0.56				AEW06
9	23	0.281	0.719		1	1	AEW07
9	16	0.36	0.64			1	AEW08
10	20	0.333	0.667			1	AEW09
9	15	0.375	0.625			1	AEW10
9	14	0.391	0.609			1	AEW11
9	16	0.36	0.64			1	AEW12
11	14	0.44	0.56				AEW13
9	12	0.429	0.571				AEW14
9	14	0.391	0.609			1	AEW15
5	20	0.2	0.8		1	1	AEW16
5	13	0.278	0.722		1	1	AEW17
9	15	0.375	0.625			1	AEW18
10	20	0.333	0.667			1	AEW19
10	14	0.417	0.583				AEW20
12	13	0.48	0.52				AEW21
9	17	0.346	0.654			1	AEW22
9	15	0.375	0.625			1	AEW23
8	14	0.364	0.636			1	AEW24
4	15	0.211	0.789		1	1	AEW25
8	13	0.381	0.619			1	AEW26
8	10	0.444	0.556				AEW27
9	12	0.429	0.571				AEW28
10	15	0.4	0.6				AEW29
7	15	0.318	0.682			1	AEW30
9	20	0.31	0.69			1	AEW31
9	16	0.36	0.64			1	AEW32
10	13	0.435	0.565				AEW33
9	16	0.36	0.64			1	AEW34
6	19	0.24	0.76		1	1	AEW35
8	14	0.364	0.636			1	AEW36
9	20	0.31	0.69			1	AEW37
5	13	0.278	0.722		1	1	AEW38
6	17	0.261	0.739		1	1	AEW39
6	11	0.353	0.647			1	AEW40
10	13	0.435	0.565				AEW41
8	13	0.381	0.619			1	AEW42
9	16	0.36	0.64			1	AEW43
8	20	0.286	0.714		1	1	AEW44
5	12	0.294	0.706		1	1	AEW45
9	11	0.45	0.55				AEW46
9	16	0.36	0.64			1	AEW47
10	19	0.345	0.655			1	AEW48
9	21	0.3	0.7			1	AEW49
12	18	0.4	0.6				AEW50
11	23	0.324	0.676			1	HEW01
11	22	0.333	0.667			1	HEW02
10	22	0.313	0.688			1	HEW03
8	21	0.276	0.724		1	1	HEW04
6	18	0.25	0.75		1	1	HEW05
6	17	0.261	0.739		1	1	HEW06
9	17	0.346	0.654			1	HEW07
8	19	0.296	0.704		1	1	HEW08
10	18	0.357	0.643			1	HEW09
11	21	0.344	0.656			1	HEW10
5	22	0.185	0.815	1	1	1	HEW11
9	17	0.346	0.654			1	HEW12
10	18	0.357	0.643			1	HEW13
9	19	0.321	0.679			1	HEW14
7	23	0.233	0.767		1	1	HEW15
10	14	0.417	0.583				HEW16
8	18	0.308	0.692			1	HEW17
3	19	0.136	0.864	1	1	1	HEW18
7	21	0.25	0.75		1	1	HEW19
7	16	0.304	0.696			1	HEW20
9	15	0.375	0.625			1	HEW21
7	19	0.269	0.731		1	1	HEW22
11	16	0.407	0.593				HEW23
10	20	0.333	0.667			1	HEW24
10	18	0.357	0.643			1	HEW25
12	15	0.444	0.556				HEW26
9	17	0.346	0.654			1	HEW27
9	18	0.333	0.667			1	HEW28
10	19	0.345	0.655			1	HEW29
8	20	0.286	0.714		1	1	HEW30
8	17	0.32	0.68			1	HEW31
8	15	0.348	0.652			1	HEW32
11	16	0.407	0.593				HEW33
8	20	0.286	0.714		1	1	HEW34
9	16	0.36	0.64			1	HEW35
10	14	0.417	0.583				HEW36
11	16	0.407	0.593				HEW37
10	18	0.357	0.643			1	HEW38
10	23	0.303	0.697			1	HEW39
10	23	0.303	0.697			1	HEW40
9	21	0.3	0.7			1	HEW41
8	17	0.32	0.68			1	HEW42
7	20	0.259	0.741		1	1	HEW43
8	23	0.258	0.742		1	1	HEW44
6	13	0.316	0.684			1	HEW45
7	18	0.28	0.72		1	1	HEW46
8	22	0.267	0.733		1	1	HEW47
10	20	0.333	0.667			1	HEW48
10	18	0.357	0.643			1	HEW49
8	17	0.32	0.68			1	HEW50
1	12	0.077	0.923	1	1	1	SEW01
2	15	0.118	0.882	1	1	1	SEW02
4	19	0.174	0.826	1	1	1	SEW03
4	18	0.182	0.818	1	1	1	SEW04
9	20	0.31	0.69			1	SEW05
11	22	0.333	0.667			1	SEW06
7	23	0.233	0.767		1	1	SEW07
10	18	0.357	0.643			1	SEW08
6	20	0.231	0.769		1	1	SEW09
1	13	0.071	0.929	1	1	1	SEW10
1	15	0.063	0.938	1	1	1	SEW11
2	12	0.143	0.857	1	1	1	SEW12
1	16	0.059	0.941	1	1	1	SEW13
3	14	0.176	0.824	1	1	1	SEW14
1	12	0.077	0.923	1	1	1	SEW15
6	23	0.207	0.793		1	1	SEW16
7	22	0.241	0.759		1	1	SEW17
6	21	0.222	0.778		1	1	SEW18
8	16	0.333	0.667			1	SEW19
4	25	0.138	0.862	1	1	1	SEW20
6	22	0.214	0.786		1	1	SEW21
8	22	0.267	0.733		1	1	SEW22
8	21	0.276	0.724		1	1	SEW23
11	15	0.423	0.577				SEW24
5	25	0.167	0.833	1	1	1	SEW25
8	23	0.258	0.742		1	1	SEW26
10	22	0.313	0.688			1	SEW27
11	17	0.393	0.607			1	SEW28
6	21	0.222	0.778		1	1	SEW29
7	18	0.28	0.72		1	1	SEW30
6	28	0.176	0.824	1	1	1	SEW31
6	21	0.222	0.778		1	1	SEW32
5	19	0.208	0.792		1	1	SEW33
5	21	0.192	0.808	1	1	1	SEW34
9	17	0.346	0.654			1	SEW35
4	15	0.211	0.789		1	1	SEW36
6	20	0.231	0.769		1	1	SEW37
10	20	0.333	0.667			1	SEW38
10	17	0.37	0.63			1	SEW39
8	19	0.296	0.704		1	1	SEW40
9	21	0.3	0.7			1	SEW41
12	17	0.414	0.586				SEW42
9	18	0.333	0.667			1	SEW43
10	16	0.385	0.615			1	SEW44
4	19	0.174	0.826	1	1	1	SEW45
8	21	0.276	0.724		1	1	SEW46
8	21	0.276	0.724		1	1	SEW47
6	25	0.194	0.806	1	1	1	SEW48
6	17	0.261	0.739		1	1	SEW49
5	16	0.238	0.762		1	1	SEW50
